# Supplementary material for: A novel route of single step reactive calcination of copper salts far below their decomposition temperatures for synthesis of highly active catalysts
Source: Royal Society of Chemistry journal article supplement (doi:10.1039/c3cy00626c), 2013-01-01

Dataset C 1s:4(31)

Dwell Time (s) 0.2597

Number of sweeps 1

| Kinetic Energy(eV) | Binding Energy(eV) | Intensity(cps) | Transmission Value |
|--------------------|--------------------|----------------|--------------------|
| 953.6              | 300                | 11043.51174    | 1                  |
| 953.7              | 299.9              | 10592.99191    | 1                  |
| 953.8              | 299.8              | 10747.01579    | 1                  |
| 953.9              | 299.7              | 11058.91413    | 1                  |
| 954                | 299.6              | 10908.74086    | 1                  |
| 954.1              | 299.5              | 11001.15518    | 1                  |
| 954.2              | 299.4              | 10512.12938    | 1                  |
| 954.3              | 299.3              | 10723.91221    | 1                  |
| 954.4              | 299.2              | 10681.55564    | 1                  |
| 954.5              | 299.1              | 10604.5437     | 1                  |
| 954.6              | 299                | 10558.33654    | 1                  |
| 954.7              | 298.9              | 11043.51174    | 1                  |
| 954.8              | 298.8              | 10489.0258     | 1                  |
| 954.9              | 298.7              | 10562.18714    | 1                  |
| 955                | 298.6              | 10515.97998    | 1                  |
| 955.1              | 298.5              | 10731.6134     | 1                  |
| 955.2              | 298.4              | 10308.04775    | 1                  |
| 955.3              | 298.3              | 10785.52176    | 1                  |
| 955.4              | 298.2              | 10415.86446    | 1                  |
| 955.5              | 298.1              | 10431.26685    | 1                  |
| 955.6              | 298                | 10481.32461    | 1                  |
| 955.7              | 297.9              | 10627.64729    | 1                  |
| 955.8              | 297.8              | 10735.464      | 1                  |
| 955.9              | 297.7              | 10377.35849    | 1                  |
| 956                | 297.6              | 10912.59145    | 1                  |
| 956.1              | 297.5              | 10412.01386    | 1                  |
| 956.2              | 297.4              | 10670.00385    | 1                  |
| 956.3              | 297.3              | 10350.40431    | 1                  |
| 956.4              | 297.2              | 10535.23296    | 1                  |
| 956.5              | 297.1              | 10608.3943     | 1                  |
| 956.6              | 297                | 10519.83057    | 1                  |
| 956.7              | 296.9              | 10304.19715    | 1                  |
| 956.8              | 296.8              | 10477.47401    | 1                  |
| 956.9              | 296.7              | 10462.07162    | 1                  |
| 957                | 296.6              | 10385.05968    | 1                  |
| 957.1              | 296.5              | 10519.83057    | 1                  |
| 957.2              | 296.4              | 10392.76088    | 1                  |
| 957.3              | 296.3              | 10535.23296    | 1                  |
| 957.4              | 296.2              | 10554.48595    | 1                  |
| 957.5              | 296.1              | 10358.10551    | 1                  |
| 957.6              | 296                | 10053.90836    | 1                  |
| 957.7              | 295.9              | 10273.39238    | 1                  |
| 957.8              | 295.8              | 10342.70312    | 1                  |
| 957.9              | 295.7              | 10238.737      | 1                  |
| 958                | 295.6              | 10423.56565    | 1                  |
| 958.1              | 295.5              | 10142.47208    | 1                  |
| 958.2              | 295.4              | 10254.13939    | 1                  |

|       |       |             |   |
|-------|-------|-------------|---|
| 958.3 | 295.3 | 10200.23104 | 1 |
| 958.4 | 295.2 | 10554.48595 | 1 |
| 958.5 | 295.1 | 10623.79669 | 1 |
| 958.6 | 295   | 10242.5876  | 1 |
| 958.7 | 294.9 | 10465.92222 | 1 |
| 958.8 | 294.8 | 9865.229111 | 1 |
| 958.9 | 294.7 | 9926.83866  | 1 |
| 959   | 294.6 | 10065.46015 | 1 |
| 959.1 | 294.5 | 10007.70119 | 1 |
| 959.2 | 294.4 | 10265.69118 | 1 |
| 959.3 | 294.3 | 10261.84059 | 1 |
| 959.4 | 294.2 | 10396.61148 | 1 |
| 959.5 | 294.1 | 10381.20909 | 1 |
| 959.6 | 294   | 10161.72507 | 1 |
| 959.7 | 293.9 | 10215.63342 | 1 |
| 959.8 | 293.8 | 9984.597613 | 1 |
| 959.9 | 293.7 | 10180.97805 | 1 |
| 960   | 293.6 | 10369.6573  | 1 |
| 960.1 | 293.5 | 10323.45014 | 1 |
| 960.2 | 293.4 | 10346.55372 | 1 |
| 960.3 | 293.3 | 10096.26492 | 1 |
| 960.4 | 293.2 | 9980.747016 | 1 |
| 960.5 | 293.1 | 9965.344628 | 1 |
| 960.6 | 293   | 10758.56758 | 1 |
| 960.7 | 292.9 | 10111.66731 | 1 |
| 960.8 | 292.8 | 10234.88641 | 1 |
| 960.9 | 292.7 | 10515.97998 | 1 |
| 961   | 292.6 | 10150.17328 | 1 |
| 961.1 | 292.5 | 10361.9561  | 1 |
| 961.2 | 292.4 | 10404.31267 | 1 |
| 961.3 | 292.3 | 10585.29072 | 1 |
| 961.4 | 292.2 | 10323.45014 | 1 |
| 961.5 | 292.1 | 10462.07162 | 1 |
| 961.6 | 292   | 11093.5695  | 1 |
| 961.7 | 291.9 | 10392.76088 | 1 |
| 961.8 | 291.8 | 10419.71506 | 1 |
| 961.9 | 291.7 | 10789.37235 | 1 |
| 962   | 291.6 | 10508.27878 | 1 |
| 962.1 | 291.5 | 10616.0955  | 1 |
| 962.2 | 291.4 | 10824.02772 | 1 |
| 962.3 | 291.3 | 10500.57759 | 1 |
| 962.4 | 291.2 | 11135.92607 | 1 |
| 962.5 | 291.1 | 10962.64921 | 1 |
| 962.6 | 291   | 10943.39623 | 1 |
| 962.7 | 290.9 | 10870.23489 | 1 |
| 962.8 | 290.8 | 10627.64729 | 1 |
| 962.9 | 290.7 | 10673.85445 | 1 |
| 963   | 290.6 | 10785.52176 | 1 |
| 963.1 | 290.5 | 10720.06161 | 1 |
| 963.2 | 290.4 | 10569.88833 | 1 |
| 963.3 | 290.3 | 10827.87832 | 1 |

|       |       |             |   |
|-------|-------|-------------|---|
| 963.4 | 290.2 | 11182.13323 | 1 |
| 963.5 | 290.1 | 10920.29265 | 1 |
| 963.6 | 290   | 10954.94802 | 1 |
| 963.7 | 289.9 | 11266.84636 | 1 |
| 963.8 | 289.8 | 10920.29265 | 1 |
| 963.9 | 289.7 | 10808.62534 | 1 |
| 964   | 289.6 | 10835.57952 | 1 |
| 964.1 | 289.5 | 11378.51367 | 1 |
| 964.2 | 289.4 | 11278.39815 | 1 |
| 964.3 | 289.3 | 11563.34232 | 1 |
| 964.4 | 289.2 | 11232.19099 | 1 |
| 964.5 | 289.1 | 11744.32037 | 1 |
| 964.6 | 289   | 11717.36619 | 1 |
| 964.7 | 288.9 | 12179.43781 | 1 |
| 964.8 | 288.8 | 11840.58529 | 1 |
| 964.9 | 288.7 | 12391.22064 | 1 |
| 965   | 288.6 | 12479.78437 | 1 |
| 965.1 | 288.5 | 12795.53331 | 1 |
| 965.2 | 288.4 | 13461.68656 | 1 |
| 965.3 | 288.3 | 13246.05314 | 1 |
| 965.4 | 288.2 | 13542.5491  | 1 |
| 965.5 | 288.1 | 13534.8479  | 1 |
| 965.6 | 288   | 13342.31806 | 1 |
| 965.7 | 287.9 | 14416.63458 | 1 |
| 965.8 | 287.8 | 14312.66846 | 1 |
| 965.9 | 287.7 | 14913.36157 | 1 |
| 966   | 287.6 | 14759.3377  | 1 |
| 966.1 | 287.5 | 15406.23797 | 1 |
| 966.2 | 287.4 | 14790.14247 | 1 |
| 966.3 | 287.3 | 15452.44513 | 1 |
| 966.4 | 287.2 | 15333.07663 | 1 |
| 966.5 | 287.1 | 15271.46708 | 1 |
| 966.6 | 287   | 15671.92915 | 1 |
| 966.7 | 286.9 | 14936.46515 | 1 |
| 966.8 | 286.8 | 14994.22411 | 1 |
| 966.9 | 286.7 | 14266.4613  | 1 |
| 967   | 286.6 | 14123.98922 | 1 |
| 967.1 | 286.5 | 13993.06893 | 1 |
| 967.2 | 286.4 | 13407.77821 | 1 |
| 967.3 | 286.3 | 13708.12476 | 1 |
| 967.4 | 286.2 | 13103.58106 | 1 |
| 967.5 | 286.1 | 13307.66269 | 1 |
| 967.6 | 286   | 13076.62688 | 1 |
| 967.7 | 285.9 | 13118.98344 | 1 |
| 967.8 | 285.8 | 12514.43974 | 1 |
| 967.9 | 285.7 | 12233.34617 | 1 |
| 968   | 285.6 | 12383.51945 | 1 |
| 968.1 | 285.5 | 12506.73854 | 1 |
| 968.2 | 285.4 | 13003.46554 | 1 |
| 968.3 | 285.3 | 12926.4536  | 1 |
| 968.4 | 285.2 | 12741.62495 | 1 |

|       |       |             |   |
|-------|-------|-------------|---|
| 968.5 | 285.1 | 12780.13092 | 1 |
| 968.6 | 285   | 12891.79823 | 1 |
| 968.7 | 284.9 | 12899.49942 | 1 |
| 968.8 | 284.8 | 13095.87986 | 1 |
| 968.9 | 284.7 | 13030.41972 | 1 |
| 969   | 284.6 | 12826.33808 | 1 |
| 969.1 | 284.5 | 12972.66076 | 1 |
| 969.2 | 284.4 | 12618.40585 | 1 |
| 969.3 | 284.3 | 12722.37197 | 1 |
| 969.4 | 284.2 | 11844.43589 | 1 |
| 969.5 | 284.1 | 12140.93184 | 1 |
| 969.6 | 284   | 11663.45784 | 1 |
| 969.7 | 283.9 | 11617.25067 | 1 |
| 969.8 | 283.8 | 11047.36234 | 1 |
| 969.9 | 283.7 | 11116.67308 | 1 |
| 970   | 283.6 | 10935.69503 | 1 |
| 970.1 | 283.5 | 10808.62534 | 1 |
| 970.2 | 283.4 | 10180.97805 | 1 |
| 970.3 | 283.3 | 9953.792838 | 1 |
| 970.4 | 283.2 | 9992.298806 | 1 |
| 970.5 | 283.1 | 10123.2191  | 1 |
| 970.6 | 283   | 10103.96612 | 1 |
| 970.7 | 282.9 | 9888.332692 | 1 |
| 970.8 | 282.8 | 9865.229111 | 1 |
| 970.9 | 282.7 | 10204.08163 | 1 |
| 971   | 282.6 | 9387.755102 | 1 |
| 971.1 | 282.5 | 9395.456296 | 1 |
| 971.2 | 282.4 | 9414.70928  | 1 |
| 971.3 | 282.3 | 9738.159415 | 1 |
| 971.4 | 282.2 | 9684.251059 | 1 |
| 971.5 | 282.1 | 9872.930304 | 1 |
| 971.6 | 282   | 9668.848672 | 1 |
| 971.7 | 281.9 | 10142.47208 | 1 |
| 971.8 | 281.8 | 9545.629573 | 1 |
| 971.9 | 281.7 | 10223.33462 | 1 |
| 972   | 281.6 | 9549.480169 | 1 |
| 972.1 | 281.5 | 9195.22526  | 1 |
| 972.2 | 281.4 | 9849.826723 | 1 |
| 972.3 | 281.3 | 9973.045822 | 1 |
| 972.4 | 281.2 | 9745.860608 | 1 |
| 972.5 | 281.1 | 9549.480169 | 1 |
| 972.6 | 281   | 9953.792838 | 1 |
| 972.7 | 280.9 | 9626.492106 | 1 |
| 972.8 | 280.8 | 9795.918367 | 1 |
| 972.9 | 280.7 | 9622.641509 | 1 |
| 973   | 280.6 | 9564.882557 | 1 |
| 973.1 | 280.5 | 9691.952253 | 1 |
| 973.2 | 280.4 | 9541.778976 | 1 |
| 973.3 | 280.3 | 9872.930304 | 1 |
| 973.4 | 280.2 | 9684.251059 | 1 |
| 973.5 | 280.1 | 9942.241047 | 1 |

|       |       |             |   |
|-------|-------|-------------|---|
| 973.6 | 280   | 9691.952253 | 1 |
| 973.7 | 279.9 | 10092.41432 | 1 |
| 973.8 | 279.8 | 9553.330766 | 1 |
| 973.9 | 279.7 | 9872.930304 | 1 |
| 974   | 279.6 | 9630.342703 | 1 |
| 974.1 | 279.5 | 10065.46015 | 1 |
| 974.2 | 279.4 | 9784.366577 | 1 |
| 974.3 | 279.3 | 9996.149403 | 1 |
| 974.4 | 279.2 | 9949.942241 | 1 |
| 974.5 | 279.1 | 9988.448209 | 1 |
| 974.6 | 279   | 10246.4382  | 1 |
| 974.7 | 278.9 | 10115.51791 | 1 |
| 974.8 | 278.8 | 9946.091644 | 1 |
| 974.9 | 278.7 | 10092.41432 | 1 |
| 975   | 278.6 | 9718.90643  | 1 |
| 975.1 | 278.5 | 9557.181363 | 1 |
| 975.2 | 278.4 | 9976.896419 | 1 |
| 975.3 | 278.3 | 9946.091644 | 1 |
| 975.4 | 278.2 | 9946.091644 | 1 |
| 975.5 | 278.1 | 9907.585676 | 1 |
| 975.6 | 278   | 9869.079707 | 1 |
| 975.7 | 277.9 | 9957.643435 | 1 |
| 975.8 | 277.8 | 9869.079707 | 1 |
| 975.9 | 277.7 | 9849.826723 | 1 |
| 976   | 277.6 | 9930.689257 | 1 |
| 976.1 | 277.5 | 10019.25298 | 1 |
| 976.2 | 277.4 | 9807.470158 | 1 |
| 976.3 | 277.3 | 9691.952253 | 1 |
| 976.4 | 277.2 | 9672.699268 | 1 |
| 976.5 | 277.1 | 9545.629573 | 1 |
| 976.6 | 277   | 10161.72507 | 1 |
| 976.7 | 276.9 | 9722.757027 | 1 |

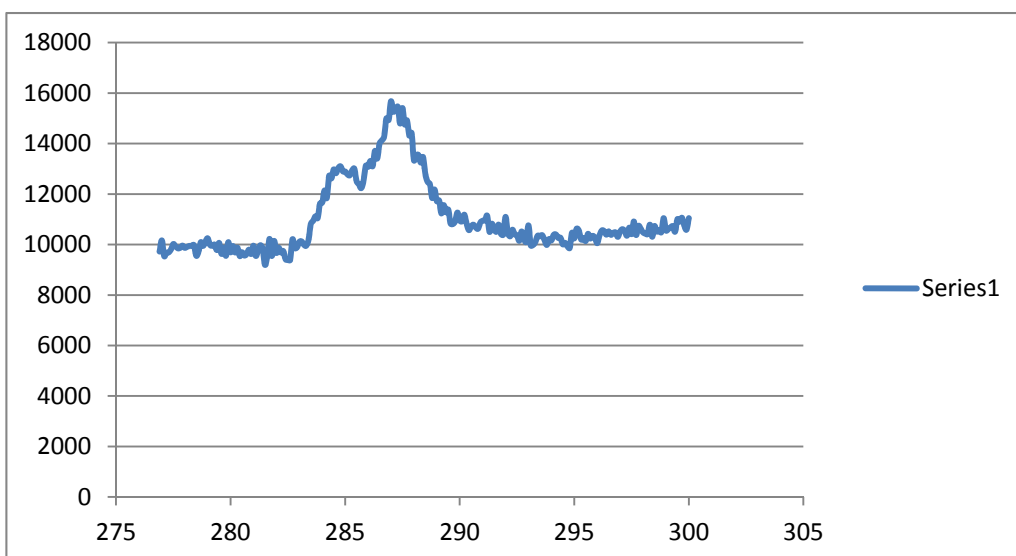

Supplement: c3cy00626c.pdf [file c3cy00626c.pdf]
