# Supplementary material for: A novel route of single step reactive calcination of copper salts far below their decomposition temperatures for synthesis of highly active catalysts
Source: Royal Society of Chemistry journal article supplement (doi:10.1039/c3cy00626c), 2013-01-01

ASAP 2020 V3.02 G

Unit 1

Serial #: 407

Page 1

Sample: PS12  
Operator:  
Submitter:  
File: C:\2020\DATA\PS12.SMP

|                                          |                                                   |
|------------------------------------------|---------------------------------------------------|
| Started: 1/11/2012 3:33:33PM             | Analysis Adsorptive: N2                           |
| Completed: 1/11/2012 7:09:52PM           | Analysis Bath Temp.: -194.596 °C                  |
| Report Time: 3/5/2012 1:31:27PM          | Thermal Correction: No                            |
| Sample Mass: 0.3920 g                    | Warm Free Space: 18.0703 cm <sup>3</sup> Measured |
| Cold Free Space: 52.1961 cm <sup>3</sup> | Equilibration Interval: 5 s                       |
| Low Pressure Dose: None                  | Automatic Degas: Yes                              |

### Summary Report

#### Surface Area

Single point surface area at P/Po = 0.313574795: 8.6918 m<sup>2</sup>/g

BET Surface Area: 3.9933 m<sup>2</sup>/g

BJH Adsorption cumulative surface area of pores  
between 17.000 Å and 3000.000 Å diameter: 7.754 m<sup>2</sup>/g

BJH Desorption cumulative surface area of pores  
between 17.000 Å and 3000.000 Å diameter: 9.6100 m<sup>2</sup>/g

#### Pore Volume

Single point adsorption total pore volume of pores  
less than 9.498 Å diameter at P/Po = 0.010802644: 0.002432 cm<sup>3</sup>/g

BJH Adsorption cumulative volume of pores  
between 17.000 Å and 3000.000 Å diameter: 0.061477 cm<sup>3</sup>/g

BJH Desorption cumulative volume of pores  
between 17.000 Å and 3000.000 Å diameter: 0.053881 cm<sup>3</sup>/g

#### Pore Size

Adsorption average pore width (4V/A by BET): 24.3597 Å

BJH Adsorption average pore diameter (4V/A): 317.137 Å

BJH Desorption average pore diameter (4V/A): 224.269 Å

ASAP 2020 V3.02 G

Unit 1

Serial #: 407

Page 2

Sample: PS12  
Operator:  
Submitter:  
File: C:\2020\DATA\PS12.SMP

Started: 1/11/2012 3:33:33PM  
Completed: 1/11/2012 7:09:52PM  
Report Time: 3/5/2012 1:31:27PM  
Sample Mass: 0.3920 g  
Cold Free Space: 52.1961 cm<sup>3</sup>  
Low Pressure Dose: None  
Analysis Adsorptive: N2  
Analysis Bath Temp.: -194.596 °C  
Thermal Correction: No  
Warm Free Space: 18.0703 cm<sup>3</sup> Measured  
Equilibration Interval: 5 s  
Automatic Degas: Yes

### Isotherm Tabular Report

| Relative Pressure (P/Po) | Absolute Pressure (mmHg) | Quantity Adsorbed (cm <sup>3</sup> /g STP) | Elapsed Time (h:min) | Saturation Pressure (mmHg) |
|--------------------------|--------------------------|--------------------------------------------|----------------------|----------------------------|
|                          |                          |                                            | 01:01                | 871.197876                 |
| 0.010802644              | 9.417426                 | 1.5722                                     | 01:17                |                            |
| 0.059866438              | 52.191936                | 1.9997                                     | 01:18                |                            |
| 0.096576490              | 84.202904                | 2.1638                                     | 01:20                |                            |
| 0.140223373              | 122.262672               | 2.3217                                     | 01:21                |                            |
| 0.183526463              | 160.032364               | 2.4682                                     | 01:23                |                            |
| 0.226832024              | 197.802292               | 2.6127                                     | 01:24                |                            |
| 0.270003728              | 235.458588               | 2.7580                                     | 01:25                |                            |
| 0.313574795              | 273.477478               | 2.9088                                     | 01:27                |                            |
| 0.356438332              | 310.872742               | 3.0597                                     | 01:28                |                            |
| 0.399779208              | 348.687408               | 3.2092                                     | 01:29                |                            |
| 0.444038010              | 387.321716               | 3.3608                                     | 01:31                |                            |
| 0.488520751              | 426.140228               | 3.5168                                     | 01:32                |                            |
| 0.532768461              | 464.756897               | 3.6819                                     | 01:33                |                            |
| 0.577265217              | 503.614655               | 3.8631                                     | 01:35                |                            |
| 0.621519582              | 542.245056               | 4.0621                                     | 01:36                |                            |
| 0.665859895              | 580.953613               | 4.3033                                     | 01:37                |                            |
| 0.710113789              | 619.615356               | 4.5983                                     | 01:39                |                            |
| 0.754387376              | 658.273621               | 4.9862                                     | 01:40                |                            |
| 0.798600379              | 696.910767               | 5.5222                                     | 01:42                |                            |
| 0.819968445              | 715.587280               | 5.8942                                     | 01:43                |                            |
| 0.840979418              | 733.953674               | 6.3478                                     | 01:44                |                            |
| 0.861614932              | 752.024719               | 6.9475                                     | 01:46                |                            |
| 0.882534660              | 770.346802               | 7.8003                                     | 01:48                |                            |
| 0.903416977              | 788.639221               | 9.0461                                     | 01:50                |                            |
| 0.923971895              | 806.648804               | 10.9419                                    | 01:52                |                            |
| 0.944223661              | 824.464233               | 14.0714                                    | 01:56                |                            |
| 0.962662322              | 840.736511               | 19.8616                                    | 02:01                |                            |
| 0.983571024              | 859.419434               | 40.0744                                    | 02:13                |                            |
| 0.968215493              | 846.175415               | 34.9677                                    | 02:18                |                            |
| 0.948414205              | 829.107605               | 23.4380                                    | 02:25                |                            |
| 0.918594390              | 803.302002               | 14.2092                                    | 02:33                |                            |
| 0.896537524              | 784.109741               | 11.2885                                    | 02:36                |                            |
| 0.871733272              | 762.478394               | 9.3438                                     | 02:38                |                            |
| 0.848036783              | 741.812500               | 8.1080                                     | 02:40                |                            |
| 0.825473249              | 722.134338               | 7.2867                                     | 02:42                |                            |
| 0.803554827              | 702.988586               | 6.6977                                     | 02:43                |                            |
| 0.781948333              | 684.142151               | 6.2571                                     | 02:45                |                            |
| 0.752704071              | 658.582703               | 5.8151                                     | 02:46                |                            |
| 0.708432521              | 619.897766               | 5.3389                                     | 02:48                |                            |
| 0.664238133              | 581.250244               | 4.9878                                     | 02:49                |                            |
| 0.619880805              | 542.456970               | 4.7109                                     | 02:50                |                            |
| 0.575518390              | 503.676666               | 4.4830                                     | 02:52                |                            |
| 0.531288790              | 464.987244               | 4.2889                                     | 02:53                |                            |
| 0.488802902              | 427.838318               | 3.6171                                     | 02:55                |                            |
| 0.442016996              | 386.903473               | 3.3909                                     | 02:56                |                            |
| 0.381795501              | 334.218109               | 3.1800                                     | 02:58                |                            |
| 0.355062451              | 310.829102               | 3.0846                                     | 02:59                |                            |
| 0.311529554              | 272.741791               | 2.9404                                     | 03:01                |                            |

ASAP 2020 V3.02 G

Unit 1

Serial #: 407

Page 3

Sample: PS12  
Operator:  
Submitter:  
File: C:\2020\DATA\PS12.SMP

Started: 1/11/2012 3:33:33PM  
Completed: 1/11/2012 7:09:52PM  
Report Time: 3/5/2012 1:31:27PM  
Sample Mass: 0.3920 g  
Cold Free Space: 52.1961 cm<sup>3</sup>  
Low Pressure Dose: None

Analysis Adsorptive: N2  
Analysis Bath Temp.: -194.596 °C  
Thermal Correction: No  
Warm Free Space: 18.0703 cm<sup>3</sup> Measured  
Equilibration Interval: 5 s  
Automatic Degas: Yes

**Isotherm Tabular Report**

| Relative Pressure (P/Po) | Absolute Pressure (mmHg) | Quantity Adsorbed (cm <sup>3</sup> /g STP) | Elapsed Time (h:min) | Saturation Pressure (mmHg) |
|--------------------------|--------------------------|--------------------------------------------|----------------------|----------------------------|
|                          |                          |                                            | 03:03                | 875.564087                 |
| 0.268691424              | 235.256561               | 2.7872                                     | 03:05                |                            |
| 0.226477567              | 198.295624               | 2.6522                                     | 03:07                |                            |
| 0.183385578              | 160.565826               | 2.5205                                     | 03:09                |                            |
| 0.140085193              | 122.653564               | 2.3861                                     | 03:10                |                            |
| 0.096778230              | 84.735542                | 2.2408                                     | 03:13                |                            |
| 0.053433649              | 46.784584                | 2.0435                                     | 03:15                |                            |
| 0.009496866              | 8.315115                 | 1.5919                                     | 03:20                |                            |

Sample: PS12  
Operator:  
Submitter:  
File: C:\2020\DATA\PS12.SMP

Started: 1/11/2012 3:33:33PM  
Completed: 1/11/2012 7:09:52PM  
Report Time: 3/5/2012 1:31:27PM  
Sample Mass: 0.3920 g  
Cold Free Space: 52.1961 cm<sup>3</sup>  
Low Pressure Dose: None

Analysis Adsorptive: N<sub>2</sub>  
Analysis Bath Temp.: -194.596 °C  
Thermal Correction: No  
Warm Free Space: 18.0703 cm<sup>3</sup> Measured  
Equilibration Interval: 5 s  
Automatic Degas: Yes

### Isotherm Linear Plot

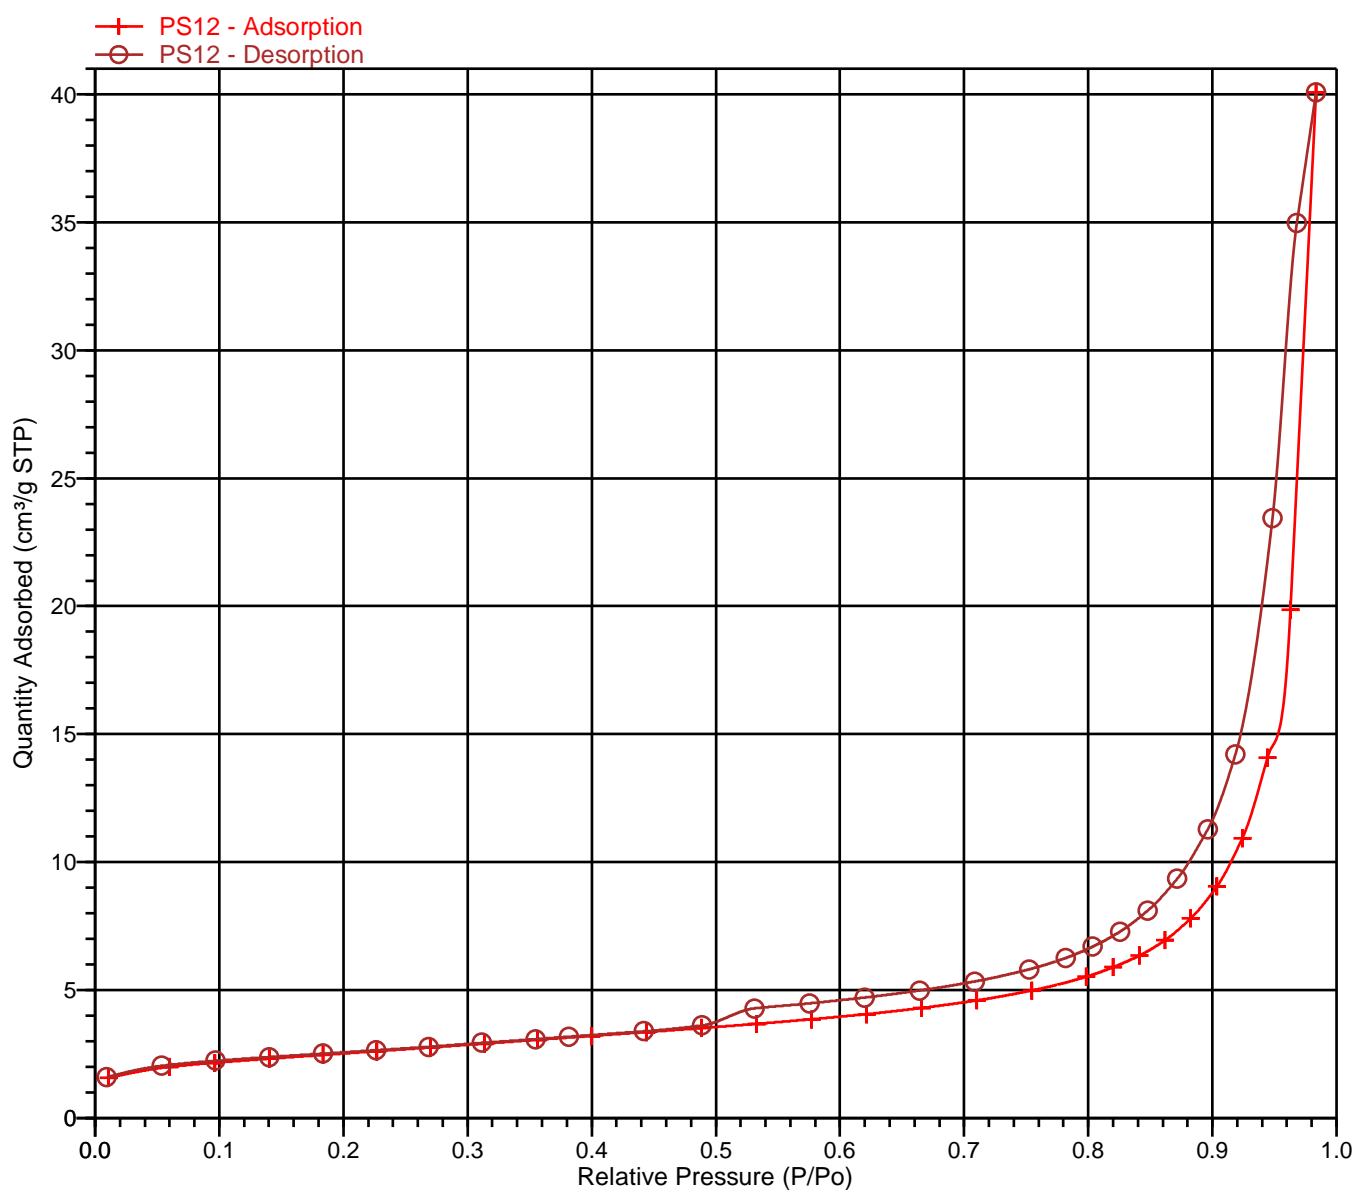

Sample: PS12  
Operator:  
Submitter:  
File: C:\2020\DATA\PS12.SMP

Started: 1/11/2012 3:33:33PM  
Completed: 1/11/2012 7:09:52PM  
Report Time: 3/5/2012 1:31:27PM  
Sample Mass: 0.3920 g  
Cold Free Space: 52.1961 cm<sup>3</sup>  
Low Pressure Dose: None

Analysis Adsorptive: N<sub>2</sub>  
Analysis Bath Temp.: -194.596 °C  
Thermal Correction: No  
Warm Free Space: 18.0703 cm<sup>3</sup> Measured  
Equilibration Interval: 5 s  
Automatic Degas: Yes

### Isotherm Log Plot

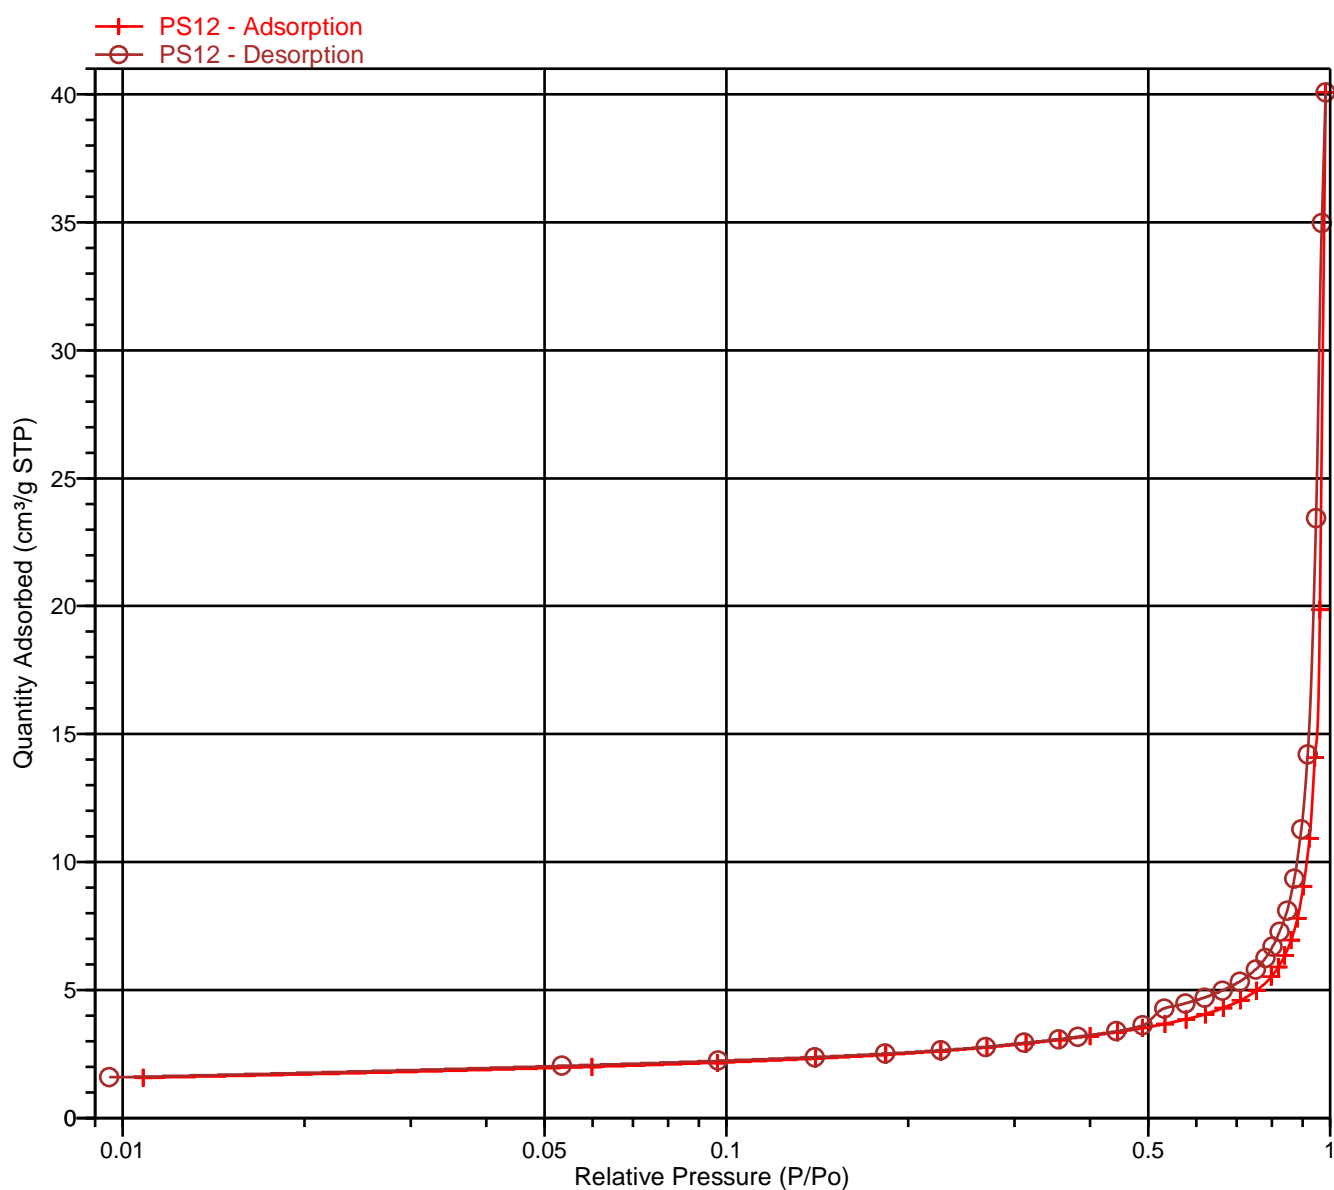

Sample: PS12  
Operator:  
Submitter:  
File: C:\2020\DATA\PS12.SMP

Started: 1/11/2012 3:33:33PM  
Completed: 1/11/2012 7:09:52PM  
Report Time: 3/5/2012 1:31:27PM  
Sample Mass: 0.3920 g  
Cold Free Space: 52.1961 cm<sup>3</sup>  
Low Pressure Dose: None  
Analysis Adsorptive: N2  
Analysis Bath Temp.: -194.596 °C  
Thermal Correction: No  
Warm Free Space: 18.0703 cm<sup>3</sup> Measured  
Equilibration Interval: 5 s  
Automatic Degas: Yes

### BET Surface Area Report

BET Surface Area: 3.9933 ± 0.4320 m<sup>2</sup>/g  
Slope: 1.306219 ± 0.099264 g/cm<sup>3</sup> STP  
Y-Intercept: -0.216100 ± 0.063687 g/cm<sup>3</sup> STP  
C: -5.044517  
Qm: 0.9173 cm<sup>3</sup>/g STP  
Correlation Coefficient: 0.9324441  
Molecular Cross-Sectional Area: 0.1620 nm<sup>2</sup>

| Relative Pressure (P/Po) | Quantity Adsorbed (cm <sup>3</sup> /g STP) | 1/[Q(Po/P - 1)] |
|--------------------------|--------------------------------------------|-----------------|
| 0.010802644              | 1.5722                                     | 0.006946        |
| 0.059866438              | 1.9997                                     | 0.031844        |
| 0.096576490              | 2.1638                                     | 0.049403        |
| 0.140223373              | 2.3217                                     | 0.070246        |
| 0.183526463              | 2.4682                                     | 0.091069        |
| 0.226832024              | 2.6127                                     | 0.112288        |
| 0.270003728              | 2.7580                                     | 0.134109        |
| 0.313574795              | 2.9088                                     | 0.157050        |
| 0.356438332              | 3.0597                                     | 0.181018        |
| 0.399779208              | 3.2092                                     | 0.207542        |
| 0.444038010              | 3.3608                                     | 0.237649        |
| 0.488520751              | 3.5168                                     | 0.271585        |
| 0.532768461              | 3.6819                                     | 0.309693        |
| 0.577265217              | 3.8631                                     | 0.353483        |
| 0.621519582              | 4.0621                                     | 0.404259        |
| 0.665859895              | 4.3033                                     | 0.463080        |
| 0.710113789              | 4.5983                                     | 0.532724        |
| 0.754387376              | 4.9862                                     | 0.615996        |
| 0.798600379              | 5.5222                                     | 0.718055        |
| 0.819968445              | 5.8942                                     | 0.772717        |
| 0.840979418              | 6.3478                                     | 0.833118        |
| 0.861614932              | 6.9475                                     | 0.896178        |
| 0.882534660              | 7.8003                                     | 0.963184        |
| 0.903416977              | 9.0461                                     | 1.034016        |
| 0.923971895              | 10.9419                                    | 1.110691        |
| 0.944223661              | 14.0714                                    | 1.203060        |
| 0.962662322              | 19.8616                                    | 1.298110        |
| 0.983571024              | 40.0744                                    | 1.493924        |

Sample: PS12  
Operator:  
Submitter:  
File: C:\2020\DATA\PS12.SMP

Started: 1/11/2012 3:33:33PM  
Completed: 1/11/2012 7:09:52PM  
Report Time: 3/5/2012 1:31:27PM  
Sample Mass: 0.3920 g  
Cold Free Space: 52.1961 cm<sup>3</sup>  
Low Pressure Dose: None

Analysis Adsorptive: N2  
Analysis Bath Temp.: -194.596 °C  
Thermal Correction: No  
Warm Free Space: 18.0703 cm<sup>3</sup> Measured  
Equilibration Interval: 5 s  
Automatic Degas: Yes

### BET Surface Area Plot

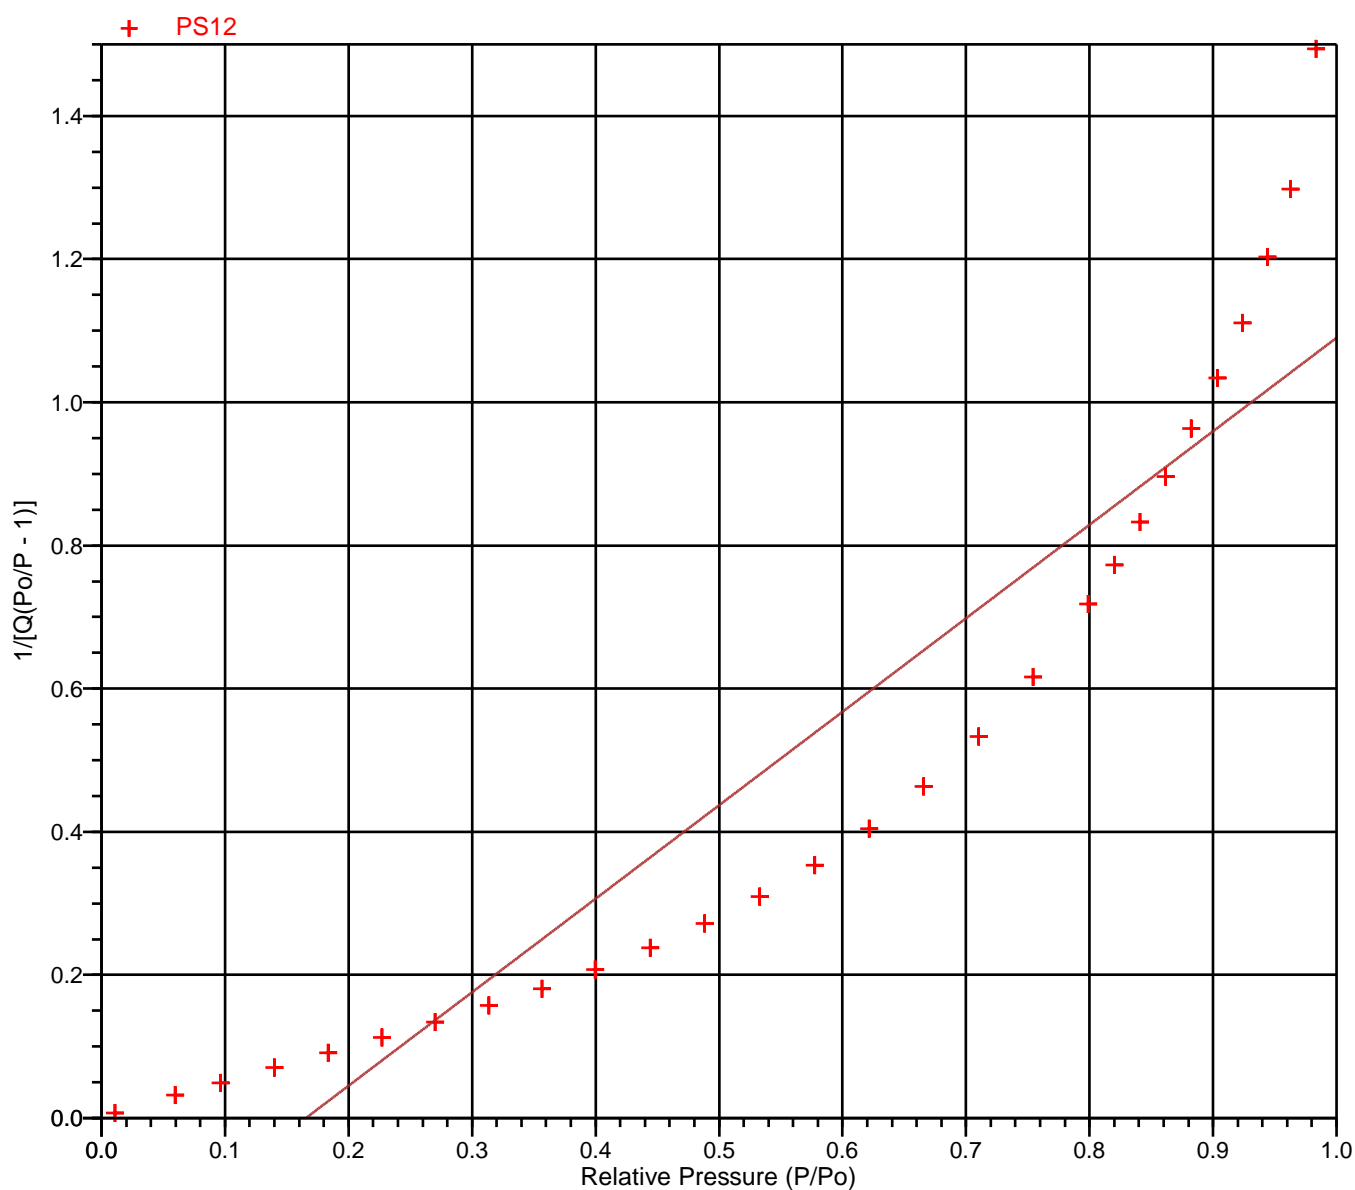

ASAP 2020 V3.02 G

Unit 1

Serial #: 407

Page 8

Sample: PS12  
 Operator:  
 Submitter:  
 File: C:\2020\DATA\PS12.SMP

Started: 1/11/2012 3:33:33PM  
 Completed: 1/11/2012 7:09:52PM  
 Report Time: 3/5/2012 1:31:27PM  
 Sample Mass: 0.3920 g  
 Cold Free Space: 52.1961 cm<sup>3</sup>  
 Low Pressure Dose: None

Analysis Adsorptive: N2  
 Analysis Bath Temp.: -194.596 °C  
 Thermal Correction: No  
 Warm Free Space: 18.0703 cm<sup>3</sup> Measured  
 Equilibration Interval: 5 s  
 Automatic Degas: Yes

### BJH Adsorption Pore Distribution Report

Faas Correction

Harkins and Jura

$$t = [ 13.99 / ( 0.034 - \log(P/P_0) ) ] ^{0.5}$$

Diameter Range: 17.000 Å to 3000.000 Å

Adsorbate Property Factor: 9.53000 Å

Density Conversion Factor: 0.0015468

Fraction of Pores Open at Both Ends: 0.00

| Pore Diameter Range (Å) | Average Diameter (Å) | Incremental Pore Volume (cm <sup>3</sup> /g) | Cumulative Pore Volume (cm <sup>3</sup> /g) | Incremental Pore Area (m <sup>2</sup> /g) | Cumulative Pore Area (m <sup>2</sup> /g) |
|-------------------------|----------------------|----------------------------------------------|---------------------------------------------|-------------------------------------------|------------------------------------------|
| 1187.8 - 534.5          | 639.0                | 0.034835                                     | 0.034835                                    | 2.181                                     | 2.181                                    |
| 534.5 - 363.3           | 415.7                | 0.010169                                     | 0.045004                                    | 0.978                                     | 3.159                                    |
| 363.3 - 270.0           | 302.3                | 0.005519                                     | 0.050523                                    | 0.730                                     | 3.889                                    |
| 270.0 - 214.8           | 235.7                | 0.003312                                     | 0.053835                                    | 0.562                                     | 4.451                                    |
| 214.8 - 178.1           | 192.7                | 0.002120                                     | 0.055955                                    | 0.440                                     | 4.892                                    |
| 178.1 - 152.1           | 162.9                | 0.001388                                     | 0.057343                                    | 0.341                                     | 5.232                                    |
| 152.1 - 133.0           | 141.2                | 0.000914                                     | 0.058257                                    | 0.259                                     | 5.491                                    |
| 133.0 - 117.9           | 124.5                | 0.000634                                     | 0.058891                                    | 0.204                                     | 5.695                                    |
| 117.9 - 105.7           | 111.1                | 0.000487                                     | 0.059379                                    | 0.175                                     | 5.871                                    |
| 105.7 - 86.9            | 94.2                 | 0.000575                                     | 0.059954                                    | 0.244                                     | 6.115                                    |
| 86.9 - 73.5             | 79.0                 | 0.000330                                     | 0.060284                                    | 0.167                                     | 6.282                                    |
| 73.5 - 63.5             | 67.7                 | 0.000183                                     | 0.060467                                    | 0.108                                     | 6.391                                    |
| 63.5 - 55.7             | 59.0                 | 0.000112                                     | 0.060579                                    | 0.076                                     | 6.466                                    |
| 55.7 - 49.4             | 52.1                 | 0.000054                                     | 0.060633                                    | 0.042                                     | 6.508                                    |
| 49.4 - 44.1             | 46.4                 | 0.000051                                     | 0.060684                                    | 0.044                                     | 6.552                                    |
| 44.1 - 39.7             | 41.6                 | 0.000047                                     | 0.060732                                    | 0.046                                     | 6.597                                    |
| 39.7 - 35.9             | 37.5                 | 0.000052                                     | 0.060784                                    | 0.055                                     | 6.653                                    |
| 35.9 - 32.5             | 34.0                 | 0.000070                                     | 0.060853                                    | 0.082                                     | 6.735                                    |
| 32.5 - 29.6             | 30.9                 | 0.000097                                     | 0.060950                                    | 0.126                                     | 6.860                                    |
| 29.6 - 27.0             | 28.1                 | 0.000125                                     | 0.061075                                    | 0.178                                     | 7.038                                    |
| 27.0 - 24.5             | 25.6                 | 0.000127                                     | 0.061202                                    | 0.198                                     | 7.236                                    |
| 24.5 - 22.3             | 23.3                 | 0.000109                                     | 0.061311                                    | 0.187                                     | 7.423                                    |
| 22.3 - 20.1             | 21.1                 | 0.000093                                     | 0.061404                                    | 0.178                                     | 7.600                                    |
| 20.1 - 18.0             | 18.9                 | 0.000073                                     | 0.061477                                    | 0.154                                     | 7.754                                    |



Sample: PS12  
Operator:  
Submitter:  
File: C:\2020\DATA\PS12.SMP

Started: 1/11/2012 3:33:33PM  
Completed: 1/11/2012 7:09:52PM  
Report Time: 3/5/2012 1:31:27PM  
Sample Mass: 0.3920 g  
Cold Free Space: 52.1961 cm<sup>3</sup>  
Low Pressure Dose: None

Analysis Adsorptive: N2  
Analysis Bath Temp.: -194.596 °C  
Thermal Correction: No  
Warm Free Space: 18.0703 cm<sup>3</sup> Measured  
Equilibration Interval: 5 s  
Automatic Degas: Yes

### BJH Adsorption dV/dD Pore Volume

Harkins and Jura : Faas Correction

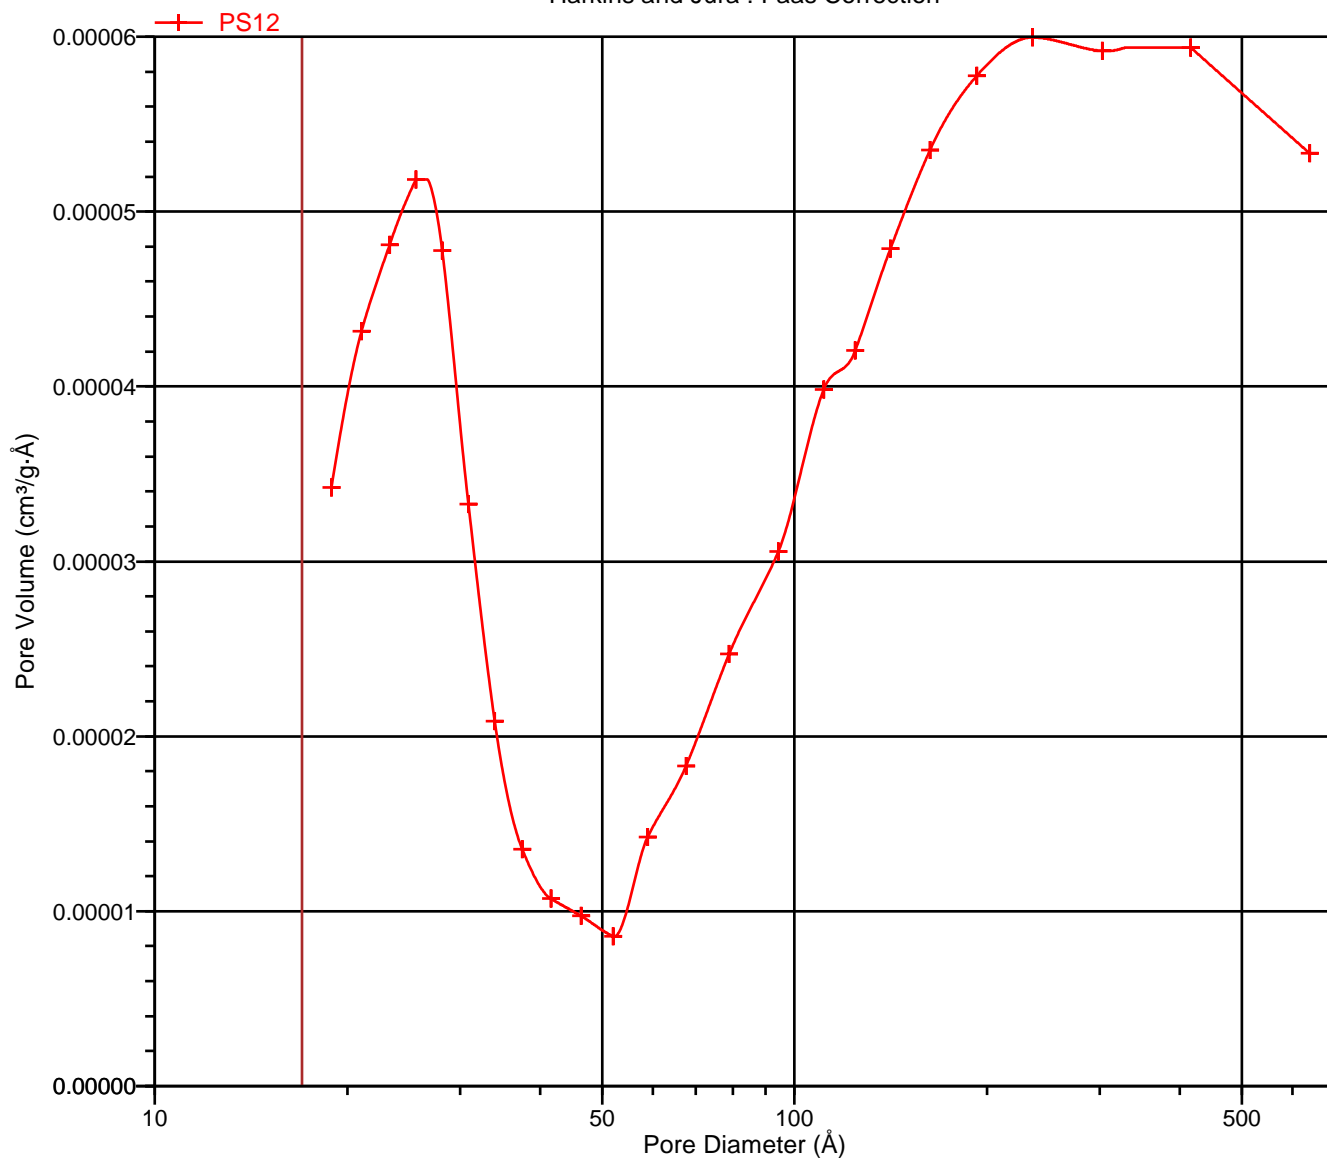

ASAP 2020 V3.02 G

Unit 1

Serial #: 407

Page 10

Sample: PS12  
Operator:  
Submitter:  
File: C:\2020\DATA\PS12.SMP

Started: 1/11/2012 3:33:33PM  
Completed: 1/11/2012 7:09:52PM  
Report Time: 3/5/2012 1:31:27PM  
Sample Mass: 0.3920 g  
Cold Free Space: 52.1961 cm<sup>3</sup>  
Low Pressure Dose: None  
Analysis Adsorptive: N2  
Analysis Bath Temp.: -194.596 °C  
Thermal Correction: No  
Warm Free Space: 18.0703 cm<sup>3</sup> Measured  
Equilibration Interval: 5 s  
Automatic Degas: Yes

### BJH Desorption Pore Distribution Report

Faas Correction

Harkins and Jura

$$t = [ 13.99 / ( 0.034 - \log(P/P_0) ) ] ^{0.5}$$

Diameter Range: 17.000 Å to 3000.000 Å

Adsorbate Property Factor: 9.53000 Å

Density Conversion Factor: 0.0015468

Fraction of Pores Open at Both Ends: 0.00

| Pore Diameter Range (Å) | Average Diameter (Å) | Incremental Pore Volume (cm <sup>3</sup> /g) | Cumulative Pore Volume (cm <sup>3</sup> /g) | Incremental Pore Area (m <sup>2</sup> /g) | Cumulative Pore Area (m <sup>2</sup> /g) |
|-------------------------|----------------------|----------------------------------------------|---------------------------------------------|-------------------------------------------|------------------------------------------|
| 623.2 - 390.2           | 453.6                | 0.020479                                     | 0.020479                                    | 1.806                                     | 1.806                                    |
| 390.2 - 251.5           | 290.6                | 0.017025                                     | 0.037504                                    | 2.344                                     | 4.150                                    |
| 251.5 - 199.7           | 219.3                | 0.005305                                     | 0.042809                                    | 0.968                                     | 5.117                                    |
| 199.7 - 162.3           | 176.8                | 0.003443                                     | 0.046252                                    | 0.779                                     | 5.896                                    |
| 162.3 - 137.6           | 147.7                | 0.002104                                     | 0.048356                                    | 0.570                                     | 6.466                                    |
| 137.6 - 120.2           | 127.6                | 0.001314                                     | 0.049669                                    | 0.412                                     | 6.878                                    |
| 120.2 - 106.9           | 112.7                | 0.000870                                     | 0.050540                                    | 0.309                                     | 7.186                                    |
| 106.9 - 96.4            | 101.1                | 0.000585                                     | 0.051124                                    | 0.231                                     | 7.418                                    |
| 96.4 - 84.9             | 89.8                 | 0.000493                                     | 0.051617                                    | 0.219                                     | 7.637                                    |
| 84.9 - 71.7             | 77.1                 | 0.000393                                     | 0.052010                                    | 0.204                                     | 7.841                                    |
| 71.7 - 61.8             | 65.9                 | 0.000187                                     | 0.052197                                    | 0.114                                     | 7.955                                    |
| 61.8 - 54.0             | 57.3                 | 0.000077                                     | 0.052275                                    | 0.054                                     | 8.009                                    |
| 54.0 - 47.8             | 50.5                 | 0.000015                                     | 0.052290                                    | 0.012                                     | 8.021                                    |
| 47.8 - 38.4             | 40.2                 | 0.001526                                     | 0.053816                                    | 1.518                                     | 9.539                                    |
| 38.4 - 34.3             | 36.1                 | 0.000064                                     | 0.053881                                    | 0.071                                     | 9.610                                    |

Sample: PS12  
Operator:  
Submitter:  
File: C:\2020\DATA\PS12.SMP

Started: 1/11/2012 3:33:33PM  
Completed: 1/11/2012 7:09:52PM  
Report Time: 3/5/2012 1:31:27PM  
Sample Mass: 0.3920 g  
Cold Free Space: 52.1961 cm<sup>3</sup>  
Low Pressure Dose: None

Analysis Adsorptive: N2  
Analysis Bath Temp.: -194.596 °C  
Thermal Correction: No  
Warm Free Space: 18.0703 cm<sup>3</sup> Measured  
Equilibration Interval: 5 s  
Automatic Degas: Yes

### BJH Desorption dV/dD Pore Volume

Harkins and Jura : Faas Correction

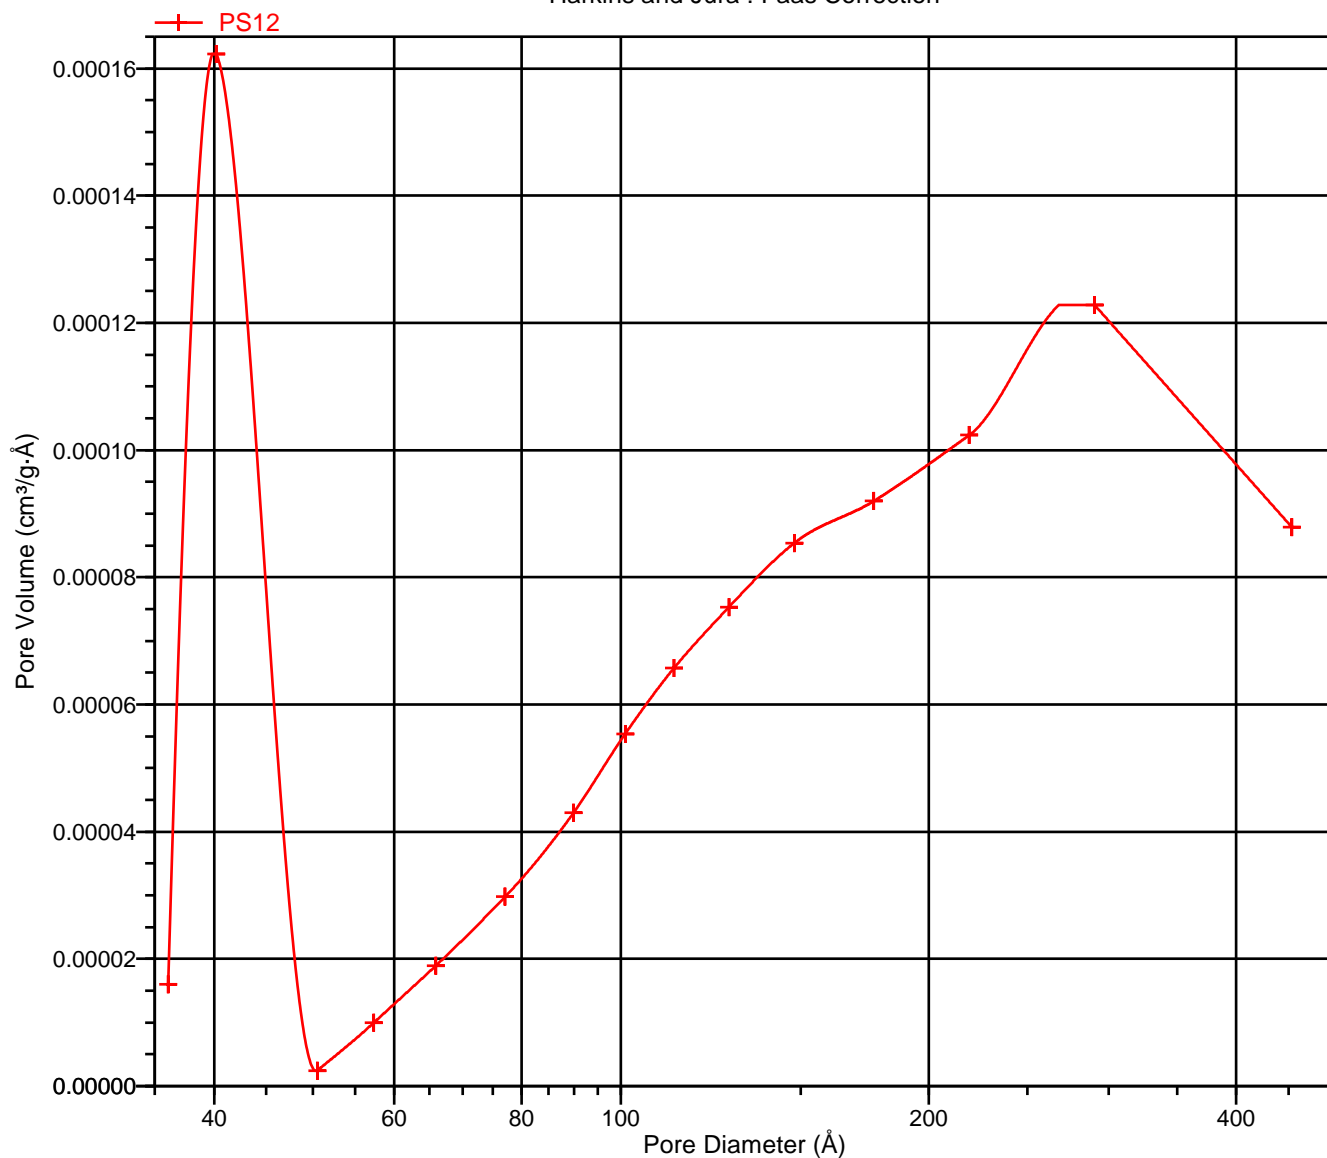

Supplement: c3cy00626c_4.pdf [file c3cy00626c_4.pdf]
