# Supplementary material for: A novel route of single step reactive calcination of copper salts far below their decomposition temperatures for synthesis of highly active catalysts
Source: Royal Society of Chemistry journal article supplement (doi:10.1039/c3cy00626c), 2013-01-01

Dataset O 1s:3(31)

Dwell Time (s) 0.3315

Number of sweeps 1

| Kinetic Energy(eV) | Binding Energy(eV) | Intensity(cps) | Transmission Value |
|--------------------|--------------------|----------------|--------------------|
| 710.6              | 543                | 54609.35143    | 1                  |
| 710.7              | 542.9              | 54247.36048    | 1                  |
| 710.8              | 542.8              | 54995.47511    | 1                  |
| 710.9              | 542.7              | 54497.73756    | 1                  |
| 711                | 542.6              | 53722.47361    | 1                  |
| 711.1              | 542.5              | 53903.46908    | 1                  |
| 711.2              | 542.4              | 55227.75264    | 1                  |
| 711.3              | 542.3              | 54642.53394    | 1                  |
| 711.4              | 542.2              | 54630.46757    | 1                  |
| 711.5              | 542.1              | 54633.48416    | 1                  |
| 711.6              | 542                | 54920.06033    | 1                  |
| 711.7              | 541.9              | 53719.45701    | 1                  |
| 711.8              | 541.8              | 54790.34691    | 1                  |
| 711.9              | 541.7              | 54401.20664    | 1                  |
| 712                | 541.6              | 54343.8914     | 1                  |
| 712.1              | 541.5              | 53870.28658    | 1                  |
| 712.2              | 541.4              | 53719.45701    | 1                  |
| 712.3              | 541.3              | 53936.65158    | 1                  |
| 712.4              | 541.2              | 53191.55354    | 1                  |
| 712.5              | 541.1              | 53680.24133    | 1                  |
| 712.6              | 541                | 53852.18703    | 1                  |
| 712.7              | 540.9              | 53601.80996    | 1                  |
| 712.8              | 540.8              | 53613.87632    | 1                  |
| 712.9              | 540.7              | 53996.98341    | 1                  |
| 713                | 540.6              | 53704.37406    | 1                  |
| 713.1              | 540.5              | 53689.2911     | 1                  |
| 713.2              | 540.4              | 54196.07843    | 1                  |
| 713.3              | 540.3              | 52826.546      | 1                  |
| 713.4              | 540.2              | 53333.33333    | 1                  |
| 713.5              | 540.1              | 54111.61388    | 1                  |
| 713.6              | 540                | 53399.69834    | 1                  |
| 713.7              | 539.9              | 53251.88537    | 1                  |
| 713.8              | 539.8              | 53481.14631    | 1                  |
| 713.9              | 539.7              | 53453.99698    | 1                  |
| 714                | 539.6              | 54277.5264     | 1                  |
| 714.1              | 539.5              | 54464.55505    | 1                  |
| 714.2              | 539.4              | 53861.2368     | 1                  |
| 714.3              | 539.3              | 53288.08447    | 1                  |
| 714.4              | 539.2              | 54247.36048    | 1                  |
| 714.5              | 539.1              | 53722.47361    | 1                  |
| 714.6              | 539                | 53028.65762    | 1                  |
| 714.7              | 538.9              | 53583.71041    | 1                  |
| 714.8              | 538.8              | 54060.33183    | 1                  |
| 714.9              | 538.7              | 53806.93816    | 1                  |
| 715                | 538.6              | 53550.5279     | 1                  |
| 715.1              | 538.5              | 53897.4359     | 1                  |
| 715.2              | 538.4              | 53001.5083     | 1                  |

|       |       |             |   |
|-------|-------|-------------|---|
| 715.3 | 538.3 | 52793.3635  | 1 |
| 715.4 | 538.2 | 53266.96833 | 1 |
| 715.5 | 538.1 | 52844.64555 | 1 |
| 715.6 | 538   | 52702.86576 | 1 |
| 715.7 | 537.9 | 52811.46305 | 1 |
| 715.8 | 537.8 | 52950.22624 | 1 |
| 715.9 | 537.7 | 53182.50377 | 1 |
| 716   | 537.6 | 53107.08899 | 1 |
| 716.1 | 537.5 | 52862.7451  | 1 |
| 716.2 | 537.4 | 52699.84917 | 1 |
| 716.3 | 537.3 | 53309.2006  | 1 |
| 716.4 | 537.2 | 52974.35897 | 1 |
| 716.5 | 537.1 | 53200.60332 | 1 |
| 716.6 | 537   | 53007.54148 | 1 |
| 716.7 | 536.9 | 53716.44042 | 1 |
| 716.8 | 536.8 | 53402.71493 | 1 |
| 716.9 | 536.7 | 53227.75264 | 1 |
| 717   | 536.6 | 53812.97134 | 1 |
| 717.1 | 536.5 | 52491.70437 | 1 |
| 717.2 | 536.4 | 53101.05581 | 1 |
| 717.3 | 536.3 | 53713.42383 | 1 |
| 717.4 | 536.2 | 54021.11614 | 1 |
| 717.5 | 536.1 | 54573.15234 | 1 |
| 717.6 | 536   | 54368.02413 | 1 |
| 717.7 | 535.9 | 54431.37255 | 1 |
| 717.8 | 535.8 | 54244.34389 | 1 |
| 717.9 | 535.7 | 54935.14329 | 1 |
| 718   | 535.6 | 55269.98492 | 1 |
| 718.1 | 535.5 | 55125.18854 | 1 |
| 718.2 | 535.4 | 56256.41026 | 1 |
| 718.3 | 535.3 | 55179.48718 | 1 |
| 718.4 | 535.2 | 56536.95324 | 1 |
| 718.5 | 535.1 | 56627.45098 | 1 |
| 718.6 | 535   | 56926.09351 | 1 |
| 718.7 | 534.9 | 56624.43439 | 1 |
| 718.8 | 534.8 | 56874.81146 | 1 |
| 718.9 | 534.7 | 57194.57014 | 1 |
| 719   | 534.6 | 58962.29261 | 1 |
| 719.1 | 534.5 | 58259.42685 | 1 |
| 719.2 | 534.4 | 58606.33484 | 1 |
| 719.3 | 534.3 | 58642.53394 | 1 |
| 719.4 | 534.2 | 59740.57315 | 1 |
| 719.5 | 534.1 | 59653.09201 | 1 |
| 719.6 | 534   | 59978.88386 | 1 |
| 719.7 | 533.9 | 61942.68477 | 1 |
| 719.8 | 533.8 | 60271.49321 | 1 |
| 719.9 | 533.7 | 61363.49925 | 1 |
| 720   | 533.6 | 62012.06637 | 1 |
| 720.1 | 533.5 | 63457.01358 | 1 |
| 720.2 | 533.4 | 62820.51282 | 1 |
| 720.3 | 533.3 | 64328.80845 | 1 |

|       |       |             |   |
|-------|-------|-------------|---|
| 720.4 | 533.2 | 64518.8537  | 1 |
| 720.5 | 533.1 | 64714.93213 | 1 |
| 720.6 | 533   | 64298.64253 | 1 |
| 720.7 | 532.9 | 65828.0543  | 1 |
| 720.8 | 532.8 | 66298.64253 | 1 |
| 720.9 | 532.7 | 65263.95174 | 1 |
| 721   | 532.6 | 65529.41177 | 1 |
| 721.1 | 532.5 | 65785.82202 | 1 |
| 721.2 | 532.4 | 65499.24585 | 1 |
| 721.3 | 532.3 | 65529.41177 | 1 |
| 721.4 | 532.2 | 65019.60784 | 1 |
| 721.5 | 532.1 | 65101.05581 | 1 |
| 721.6 | 532   | 64491.70437 | 1 |
| 721.7 | 531.9 | 64618.40121 | 1 |
| 721.8 | 531.8 | 64398.19005 | 1 |
| 721.9 | 531.7 | 63990.95023 | 1 |
| 722   | 531.6 | 63785.82202 | 1 |
| 722.1 | 531.5 | 63390.64857 | 1 |
| 722.2 | 531.4 | 62657.61689 | 1 |
| 722.3 | 531.3 | 62582.20211 | 1 |
| 722.4 | 531.2 | 61363.49925 | 1 |
| 722.5 | 531.1 | 61746.60634 | 1 |
| 722.6 | 531   | 62561.08597 | 1 |
| 722.7 | 530.9 | 60229.26094 | 1 |
| 722.8 | 530.8 | 60126.69683 | 1 |
| 722.9 | 530.7 | 58558.06938 | 1 |
| 723   | 530.6 | 58265.46003 | 1 |
| 723.1 | 530.5 | 57571.64404 | 1 |
| 723.2 | 530.4 | 57363.49925 | 1 |
| 723.3 | 530.3 | 58033.1825  | 1 |
| 723.4 | 530.2 | 56745.09804 | 1 |
| 723.5 | 530.1 | 55939.66817 | 1 |
| 723.6 | 530   | 55218.70287 | 1 |
| 723.7 | 529.9 | 55553.5445  | 1 |
| 723.8 | 529.8 | 55616.89291 | 1 |
| 723.9 | 529.7 | 55625.94269 | 1 |
| 724   | 529.6 | 56280.54299 | 1 |
| 724.1 | 529.5 | 56705.88235 | 1 |
| 724.2 | 529.4 | 56075.41478 | 1 |
| 724.3 | 529.3 | 52368.02413 | 1 |
| 724.4 | 529.2 | 52880.84465 | 1 |
| 724.5 | 529.1 | 51815.98793 | 1 |
| 724.6 | 529   | 51797.88839 | 1 |
| 724.7 | 528.9 | 51764.70588 | 1 |
| 724.8 | 528.8 | 50904.97738 | 1 |
| 724.9 | 528.7 | 51263.95174 | 1 |
| 725   | 528.6 | 51453.99698 | 1 |
| 725.1 | 528.5 | 50784.31373 | 1 |
| 725.2 | 528.4 | 49960.78431 | 1 |
| 725.3 | 528.3 | 50208.1448  | 1 |
| 725.4 | 528.2 | 51076.92308 | 1 |

|       |       |             |   |
|-------|-------|-------------|---|
| 725.5 | 528.1 | 51067.8733  | 1 |
| 725.6 | 528   | 51022.62443 | 1 |
| 725.7 | 527.9 | 50214.17798 | 1 |
| 725.8 | 527.8 | 50328.80845 | 1 |
| 725.9 | 527.7 | 50880.84465 | 1 |
| 726   | 527.6 | 51061.84012 | 1 |
| 726.1 | 527.5 | 50711.91554 | 1 |
| 726.2 | 527.4 | 50675.71644 | 1 |
| 726.3 | 527.3 | 50917.04374 | 1 |
| 726.4 | 527.2 | 50479.63801 | 1 |
| 726.5 | 527.1 | 50286.57617 | 1 |
| 726.6 | 527   | 50295.62594 | 1 |
| 726.7 | 526.9 | 50123.68024 | 1 |
| 726.8 | 526.8 | 51239.81901 | 1 |
| 726.9 | 526.7 | 50570.13575 | 1 |
| 727   | 526.6 | 51155.35445 | 1 |
| 727.1 | 526.5 | 50763.19759 | 1 |
| 727.2 | 526.4 | 50995.47511 | 1 |
| 727.3 | 526.3 | 51161.38763 | 1 |
| 727.4 | 526.2 | 51668.17496 | 1 |
| 727.5 | 526.1 | 50479.63801 | 1 |
| 727.6 | 526   | 51294.11765 | 1 |
| 727.7 | 525.9 | 50920.06033 | 1 |
| 727.8 | 525.8 | 50506.78733 | 1 |
| 727.9 | 525.7 | 50684.76621 | 1 |
| 728   | 525.6 | 50413.273   | 1 |
| 728.1 | 525.5 | 51001.5083  | 1 |
| 728.2 | 525.4 | 51079.93967 | 1 |
| 728.3 | 525.3 | 50549.01961 | 1 |
| 728.4 | 525.2 | 51025.64103 | 1 |
| 728.5 | 525.1 | 51134.23831 | 1 |
| 728.6 | 525   | 50642.53394 | 1 |
| 728.7 | 524.9 | 50410.25641 | 1 |

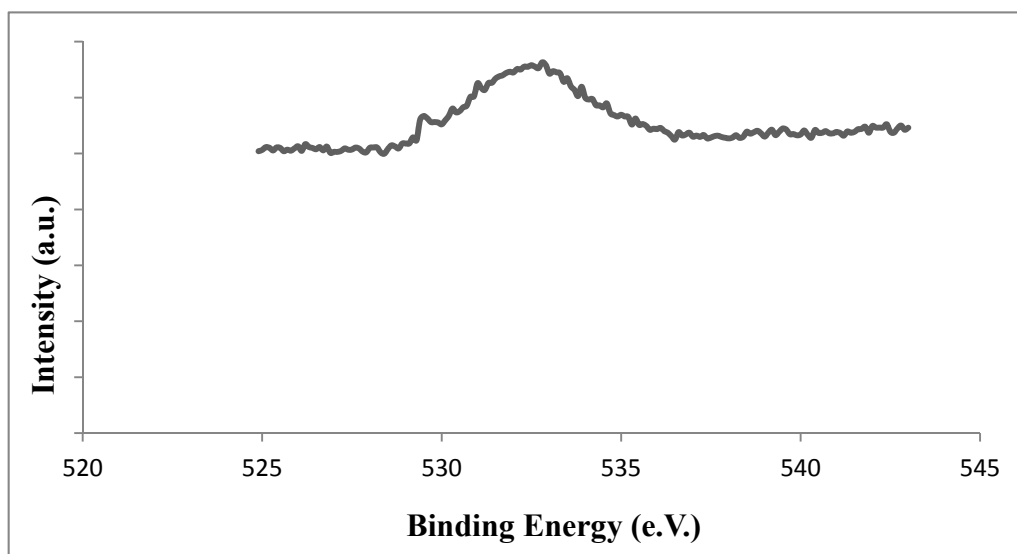

Supplement: c3cy00626c_6.pdf [file c3cy00626c_6.pdf]
