# Supplementary material for: A novel route of single step reactive calcination of copper salts far below their decomposition temperatures for synthesis of highly active catalysts
Source: Royal Society of Chemistry journal article supplement (doi:10.1039/c3cy00626c), 2013-01-01

Dataset Cu 2p:5(31)

Dwell Time (s) 0.1425

Number of sweeps 1

| Kinetic Energy(eV) | Binding Energy(eV) | Intensity(cps) | Transmission Value |
|--------------------|--------------------|----------------|--------------------|
| 283.6              | 970                | 106308.7719    | 1                  |
| 283.7              | 969.9              | 106743.8596    | 1                  |
| 283.8              | 969.8              | 104343.8596    | 1                  |
| 283.9              | 969.7              | 105459.6491    | 1                  |
| 284                | 969.6              | 104484.2105    | 1                  |
| 284.1              | 969.5              | 105382.4561    | 1                  |
| 284.2              | 969.4              | 105578.9474    | 1                  |
| 284.3              | 969.3              | 105522.807     | 1                  |
| 284.4              | 969.2              | 107578.9474    | 1                  |
| 284.5              | 969.1              | 105775.4386    | 1                  |
| 284.6              | 969                | 107038.5965    | 1                  |
| 284.7              | 968.9              | 105817.5439    | 1                  |
| 284.8              | 968.8              | 108561.4035    | 1                  |
| 284.9              | 968.7              | 105319.2982    | 1                  |
| 285                | 968.6              | 105950.8772    | 1                  |
| 285.1              | 968.5              | 105719.2982    | 1                  |
| 285.2              | 968.4              | 105354.386     | 1                  |
| 285.3              | 968.3              | 106231.5789    | 1                  |
| 285.4              | 968.2              | 105578.9474    | 1                  |
| 285.5              | 968.1              | 105494.7368    | 1                  |
| 285.6              | 968                | 106070.1754    | 1                  |
| 285.7              | 967.9              | 104673.6842    | 1                  |
| 285.8              | 967.8              | 107115.7895    | 1                  |
| 285.9              | 967.7              | 106056.1404    | 1                  |
| 286                | 967.6              | 107305.2632    | 1                  |
| 286.1              | 967.5              | 106357.8947    | 1                  |
| 286.2              | 967.4              | 107094.7368    | 1                  |
| 286.3              | 967.3              | 106280.7018    | 1                  |
| 286.4              | 967.2              | 105726.3158    | 1                  |
| 286.5              | 967.1              | 106084.2105    | 1                  |
| 286.6              | 967                | 105536.8421    | 1                  |
| 286.7              | 966.9              | 106322.807     | 1                  |
| 286.8              | 966.8              | 107824.5614    | 1                  |
| 286.9              | 966.7              | 108849.1228    | 1                  |
| 287                | 966.6              | 110540.3509    | 1                  |
| 287.1              | 966.5              | 108105.2632    | 1                  |
| 287.2              | 966.4              | 108771.9298    | 1                  |
| 287.3              | 966.3              | 110750.8772    | 1                  |
| 287.4              | 966.2              | 109059.6491    | 1                  |
| 287.5              | 966.1              | 109178.9474    | 1                  |
| 287.6              | 966                | 108835.0877    | 1                  |
| 287.7              | 965.9              | 108743.8596    | 1                  |
| 287.8              | 965.8              | 109642.1053    | 1                  |

|       |       |             |   |
|-------|-------|-------------|---|
| 287.9 | 965.7 | 110168.4211 | 1 |
| 288   | 965.6 | 109943.8596 | 1 |
| 288.1 | 965.5 | 111873.6842 | 1 |
| 288.2 | 965.4 | 111305.2632 | 1 |
| 288.3 | 965.3 | 112294.7368 | 1 |
| 288.4 | 965.2 | 110750.8772 | 1 |
| 288.5 | 965.1 | 109368.4211 | 1 |
| 288.6 | 965   | 110877.193  | 1 |
| 288.7 | 964.9 | 109943.8596 | 1 |
| 288.8 | 964.8 | 108961.4035 | 1 |
| 288.9 | 964.7 | 109501.7544 | 1 |
| 289   | 964.6 | 109936.8421 | 1 |
| 289.1 | 964.5 | 108729.8246 | 1 |
| 289.2 | 964.4 | 110491.2281 | 1 |
| 289.3 | 964.3 | 109024.5614 | 1 |
| 289.4 | 964.2 | 107971.9298 | 1 |
| 289.5 | 964.1 | 109298.2456 | 1 |
| 289.6 | 964   | 108596.4912 | 1 |
| 289.7 | 963.9 | 107873.6842 | 1 |
| 289.8 | 963.8 | 108133.3333 | 1 |
| 289.9 | 963.7 | 107831.5789 | 1 |
| 290   | 963.6 | 105838.5965 | 1 |
| 290.1 | 963.5 | 107817.5439 | 1 |
| 290.2 | 963.4 | 107221.0526 | 1 |
| 290.3 | 963.3 | 106266.6667 | 1 |
| 290.4 | 963.2 | 103950.8772 | 1 |
| 290.5 | 963.1 | 105235.0877 | 1 |
| 290.6 | 963   | 106736.8421 | 1 |
| 290.7 | 962.9 | 106371.9298 | 1 |
| 290.8 | 962.8 | 103403.5088 | 1 |
| 290.9 | 962.7 | 103368.4211 | 1 |
| 291   | 962.6 | 103136.8421 | 1 |
| 291.1 | 962.5 | 103115.7895 | 1 |
| 291.2 | 962.4 | 102428.0702 | 1 |
| 291.3 | 962.3 | 104168.4211 | 1 |
| 291.4 | 962.2 | 103122.807  | 1 |
| 291.5 | 962.1 | 102645.614  | 1 |
| 291.6 | 962   | 104645.614  | 1 |
| 291.7 | 961.9 | 104568.4211 | 1 |
| 291.8 | 961.8 | 103010.5263 | 1 |
| 291.9 | 961.7 | 103719.2982 | 1 |
| 292   | 961.6 | 103010.5263 | 1 |
| 292.1 | 961.5 | 102954.386  | 1 |
| 292.2 | 961.4 | 101761.4035 | 1 |
| 292.3 | 961.3 | 102975.4386 | 1 |
| 292.4 | 961.2 | 102652.6316 | 1 |
| 292.5 | 961.1 | 104750.8772 | 1 |

|       |       |             |   |
|-------|-------|-------------|---|
| 292.6 | 961   | 102666.6667 | 1 |
| 292.7 | 960.9 | 103810.5263 | 1 |
| 292.8 | 960.8 | 103571.9298 | 1 |
| 292.9 | 960.7 | 102000      | 1 |
| 293   | 960.6 | 105459.6491 | 1 |
| 293.1 | 960.5 | 102056.1404 | 1 |
| 293.2 | 960.4 | 103761.4035 | 1 |
| 293.3 | 960.3 | 102743.8596 | 1 |
| 293.4 | 960.2 | 103529.8246 | 1 |
| 293.5 | 960.1 | 103382.4561 | 1 |
| 293.6 | 960   | 102210.5263 | 1 |
| 293.7 | 959.9 | 101782.4561 | 1 |
| 293.8 | 959.8 | 102884.2105 | 1 |
| 293.9 | 959.7 | 103600      | 1 |
| 294   | 959.6 | 103178.9474 | 1 |
| 294.1 | 959.5 | 103529.8246 | 1 |
| 294.2 | 959.4 | 104126.3158 | 1 |
| 294.3 | 959.3 | 105305.2632 | 1 |
| 294.4 | 959.2 | 103733.3333 | 1 |
| 294.5 | 959.1 | 104385.9649 | 1 |
| 294.6 | 959   | 105066.6667 | 1 |
| 294.7 | 958.9 | 105354.386  | 1 |
| 294.8 | 958.8 | 103887.7193 | 1 |
| 294.9 | 958.7 | 105726.3158 | 1 |
| 295   | 958.6 | 106168.4211 | 1 |
| 295.1 | 958.5 | 105221.0526 | 1 |
| 295.2 | 958.4 | 105775.4386 | 1 |
| 295.3 | 958.3 | 105789.4737 | 1 |
| 295.4 | 958.2 | 106133.3333 | 1 |
| 295.5 | 958.1 | 106140.3509 | 1 |
| 295.6 | 958   | 105578.9474 | 1 |
| 295.7 | 957.9 | 107080.7018 | 1 |
| 295.8 | 957.8 | 107466.6667 | 1 |
| 295.9 | 957.7 | 106070.1754 | 1 |
| 296   | 957.6 | 108400      | 1 |
| 296.1 | 957.5 | 106007.0175 | 1 |
| 296.2 | 957.4 | 107929.8246 | 1 |
| 296.3 | 957.3 | 106329.8246 | 1 |
| 296.4 | 957.2 | 107929.8246 | 1 |
| 296.5 | 957.1 | 108905.2632 | 1 |
| 296.6 | 957   | 107880.7018 | 1 |
| 296.7 | 956.9 | 107852.6316 | 1 |
| 296.8 | 956.8 | 110505.2632 | 1 |
| 296.9 | 956.7 | 110603.5088 | 1 |
| 297   | 956.6 | 106392.9825 | 1 |
| 297.1 | 956.5 | 106954.386  | 1 |
| 297.2 | 956.4 | 107031.5789 | 1 |

|       |       |             |   |
|-------|-------|-------------|---|
| 297.3 | 956.3 | 108357.8947 | 1 |
| 297.4 | 956.2 | 106743.8596 | 1 |
| 297.5 | 956.1 | 109143.8596 | 1 |
| 297.6 | 956   | 108568.4211 | 1 |
| 297.7 | 955.9 | 104933.3333 | 1 |
| 297.8 | 955.8 | 106392.9825 | 1 |
| 297.9 | 955.7 | 106063.1579 | 1 |
| 298   | 955.6 | 106666.6667 | 1 |
| 298.1 | 955.5 | 105859.6491 | 1 |
| 298.2 | 955.4 | 105263.1579 | 1 |
| 298.3 | 955.3 | 103971.9298 | 1 |
| 298.4 | 955.2 | 102645.614  | 1 |
| 298.5 | 955.1 | 103228.0702 | 1 |
| 298.6 | 955   | 101150.8772 | 1 |
| 298.7 | 954.9 | 101705.2632 | 1 |
| 298.8 | 954.8 | 101298.2456 | 1 |
| 298.9 | 954.7 | 101185.9649 | 1 |
| 299   | 954.6 | 101585.9649 | 1 |
| 299.1 | 954.5 | 101768.4211 | 1 |
| 299.2 | 954.4 | 101740.3509 | 1 |
| 299.3 | 954.3 | 100750.8772 | 1 |
| 299.4 | 954.2 | 101691.2281 | 1 |
| 299.5 | 954.1 | 100301.7544 | 1 |
| 299.6 | 954   | 98407.01754 | 1 |
| 299.7 | 953.9 | 99178.94737 | 1 |
| 299.8 | 953.8 | 98421.05263 | 1 |
| 299.9 | 953.7 | 98603.50877 | 1 |
| 300   | 953.6 | 98000       | 1 |
| 300.1 | 953.5 | 97635.08772 | 1 |
| 300.2 | 953.4 | 98526.31579 | 1 |
| 300.3 | 953.3 | 97733.33333 | 1 |
| 300.4 | 953.2 | 97950.87719 | 1 |
| 300.5 | 953.1 | 95136.84211 | 1 |
| 300.6 | 953   | 96778.94737 | 1 |
| 300.7 | 952.9 | 96428.07018 | 1 |
| 300.8 | 952.8 | 95894.73684 | 1 |
| 300.9 | 952.7 | 95978.94737 | 1 |
| 301   | 952.6 | 97136.84211 | 1 |
| 301.1 | 952.5 | 96140.35088 | 1 |
| 301.2 | 952.4 | 95066.66667 | 1 |
| 301.3 | 952.3 | 95466.66667 | 1 |
| 301.4 | 952.2 | 95908.77193 | 1 |
| 301.5 | 952.1 | 95487.7193  | 1 |
| 301.6 | 952   | 96357.89474 | 1 |
| 301.7 | 951.9 | 96014.03509 | 1 |
| 301.8 | 951.8 | 96884.21053 | 1 |
| 301.9 | 951.7 | 95978.94737 | 1 |

|       |       |             |   |
|-------|-------|-------------|---|
| 302   | 951.6 | 94098.24561 | 1 |
| 302.1 | 951.5 | 92736.84211 | 1 |
| 302.2 | 951.4 | 94863.1579  | 1 |
| 302.3 | 951.3 | 95207.01754 | 1 |
| 302.4 | 951.2 | 96049.12281 | 1 |
| 302.5 | 951.1 | 94785.96491 | 1 |
| 302.6 | 951   | 96231.57895 | 1 |
| 302.7 | 950.9 | 97487.7193  | 1 |
| 302.8 | 950.8 | 96329.82456 | 1 |
| 302.9 | 950.7 | 95901.75439 | 1 |
| 303   | 950.6 | 96154.38597 | 1 |
| 303.1 | 950.5 | 95207.01754 | 1 |
| 303.2 | 950.4 | 93705.26316 | 1 |
| 303.3 | 950.3 | 93424.5614  | 1 |
| 303.4 | 950.2 | 93501.75439 | 1 |
| 303.5 | 950.1 | 94477.19298 | 1 |
| 303.6 | 950   | 95171.92983 | 1 |
| 303.7 | 949.9 | 96049.12281 | 1 |
| 303.8 | 949.8 | 94821.05263 | 1 |
| 303.9 | 949.7 | 94596.49123 | 1 |
| 304   | 949.6 | 94673.68421 | 1 |
| 304.1 | 949.5 | 94807.01754 | 1 |
| 304.2 | 949.4 | 94884.21053 | 1 |
| 304.3 | 949.3 | 96133.33333 | 1 |
| 304.4 | 949.2 | 95719.29825 | 1 |
| 304.5 | 949.1 | 95810.52632 | 1 |
| 304.6 | 949   | 94112.2807  | 1 |
| 304.7 | 948.9 | 94828.07018 | 1 |
| 304.8 | 948.8 | 97207.01754 | 1 |
| 304.9 | 948.7 | 97473.68421 | 1 |
| 305   | 948.6 | 97319.29825 | 1 |
| 305.1 | 948.5 | 96224.5614  | 1 |
| 305.2 | 948.4 | 97691.22807 | 1 |
| 305.3 | 948.3 | 97515.78947 | 1 |
| 305.4 | 948.2 | 98322.80702 | 1 |
| 305.5 | 948.1 | 97073.68421 | 1 |
| 305.6 | 948   | 98119.29825 | 1 |
| 305.7 | 947.9 | 98063.1579  | 1 |
| 305.8 | 947.8 | 98743.85965 | 1 |
| 305.9 | 947.7 | 97698.24561 | 1 |
| 306   | 947.6 | 98757.89474 | 1 |
| 306.1 | 947.5 | 98898.24561 | 1 |
| 306.2 | 947.4 | 100778.9474 | 1 |
| 306.3 | 947.3 | 100856.1404 | 1 |
| 306.4 | 947.2 | 100764.9123 | 1 |
| 306.5 | 947.1 | 100610.5263 | 1 |
| 306.6 | 947   | 100526.3158 | 1 |

|       |       |             |   |
|-------|-------|-------------|---|
| 306.7 | 946.9 | 101719.2982 | 1 |
| 306.8 | 946.8 | 100764.9123 | 1 |
| 306.9 | 946.7 | 99431.57895 | 1 |
| 307   | 946.6 | 100617.5439 | 1 |
| 307.1 | 946.5 | 101389.4737 | 1 |
| 307.2 | 946.4 | 101136.8421 | 1 |
| 307.3 | 946.3 | 102596.4912 | 1 |
| 307.4 | 946.2 | 99936.84211 | 1 |
| 307.5 | 946.1 | 101094.7368 | 1 |
| 307.6 | 946   | 100807.0175 | 1 |
| 307.7 | 945.9 | 101571.9298 | 1 |
| 307.8 | 945.8 | 100638.5965 | 1 |
| 307.9 | 945.7 | 100266.6667 | 1 |
| 308   | 945.6 | 100982.4561 | 1 |
| 308.1 | 945.5 | 99775.4386  | 1 |
| 308.2 | 945.4 | 99880.70175 | 1 |
| 308.3 | 945.3 | 100175.4386 | 1 |
| 308.4 | 945.2 | 100814.0351 | 1 |
| 308.5 | 945.1 | 99796.49123 | 1 |
| 308.6 | 945   | 101115.7895 | 1 |
| 308.7 | 944.9 | 100807.0175 | 1 |
| 308.8 | 944.8 | 100715.7895 | 1 |
| 308.9 | 944.7 | 99719.29825 | 1 |
| 309   | 944.6 | 100505.2632 | 1 |
| 309.1 | 944.5 | 101452.6316 | 1 |
| 309.2 | 944.4 | 100631.5789 | 1 |
| 309.3 | 944.3 | 100259.6491 | 1 |
| 309.4 | 944.2 | 98140.35088 | 1 |
| 309.5 | 944.1 | 100449.1228 | 1 |
| 309.6 | 944   | 99207.01754 | 1 |
| 309.7 | 943.9 | 97073.68421 | 1 |
| 309.8 | 943.8 | 97529.82456 | 1 |
| 309.9 | 943.7 | 98680.70175 | 1 |
| 310   | 943.6 | 98077.19298 | 1 |
| 310.1 | 943.5 | 97192.98246 | 1 |
| 310.2 | 943.4 | 97515.78947 | 1 |
| 310.3 | 943.3 | 97452.63158 | 1 |
| 310.4 | 943.2 | 97487.7193  | 1 |
| 310.5 | 943.1 | 95003.50877 | 1 |
| 310.6 | 943   | 97628.07018 | 1 |
| 310.7 | 942.9 | 95887.7193  | 1 |
| 310.8 | 942.8 | 93719.29825 | 1 |
| 310.9 | 942.7 | 95628.07018 | 1 |
| 311   | 942.6 | 95712.2807  | 1 |
| 311.1 | 942.5 | 95677.19298 | 1 |
| 311.2 | 942.4 | 94568.42105 | 1 |
| 311.3 | 942.3 | 93291.22807 | 1 |

|       |       |             |   |
|-------|-------|-------------|---|
| 311.4 | 942.2 | 95178.94737 | 1 |
| 311.5 | 942.1 | 94645.61404 | 1 |
| 311.6 | 942   | 94400       | 1 |
| 311.7 | 941.9 | 92996.49123 | 1 |
| 311.8 | 941.8 | 92610.52632 | 1 |
| 311.9 | 941.7 | 92456.14035 | 1 |
| 312   | 941.6 | 92961.40351 | 1 |
| 312.1 | 941.5 | 92624.5614  | 1 |
| 312.2 | 941.4 | 93382.45614 | 1 |
| 312.3 | 941.3 | 92000       | 1 |
| 312.4 | 941.2 | 91550.87719 | 1 |
| 312.5 | 941.1 | 92821.05263 | 1 |
| 312.6 | 941   | 94315.78947 | 1 |
| 312.7 | 940.9 | 92849.12281 | 1 |
| 312.8 | 940.8 | 93578.94737 | 1 |
| 312.9 | 940.7 | 93775.4386  | 1 |
| 313   | 940.6 | 92392.98246 | 1 |
| 313.1 | 940.5 | 94063.1579  | 1 |
| 313.2 | 940.4 | 91810.52632 | 1 |
| 313.3 | 940.3 | 93389.47368 | 1 |
| 313.4 | 940.2 | 94926.31579 | 1 |
| 313.5 | 940.1 | 94112.2807  | 1 |
| 313.6 | 940   | 93964.91228 | 1 |
| 313.7 | 939.9 | 95522.80702 | 1 |
| 313.8 | 939.8 | 94708.77193 | 1 |
| 313.9 | 939.7 | 94680.70175 | 1 |
| 314   | 939.6 | 95178.94737 | 1 |
| 314.1 | 939.5 | 97494.73684 | 1 |
| 314.2 | 939.4 | 97971.92983 | 1 |
| 314.3 | 939.3 | 96715.78947 | 1 |
| 314.4 | 939.2 | 96940.35088 | 1 |
| 314.5 | 939.1 | 97277.19298 | 1 |
| 314.6 | 939   | 99319.29825 | 1 |
| 314.7 | 938.9 | 99403.50877 | 1 |
| 314.8 | 938.8 | 100610.5263 | 1 |
| 314.9 | 938.7 | 101719.2982 | 1 |
| 315   | 938.6 | 101677.193  | 1 |
| 315.1 | 938.5 | 102771.9298 | 1 |
| 315.2 | 938.4 | 102484.2105 | 1 |
| 315.3 | 938.3 | 103129.8246 | 1 |
| 315.4 | 938.2 | 103656.1404 | 1 |
| 315.5 | 938.1 | 103382.4561 | 1 |
| 315.6 | 938   | 102147.3684 | 1 |
| 315.7 | 937.9 | 103536.8421 | 1 |
| 315.8 | 937.8 | 104638.5965 | 1 |
| 315.9 | 937.7 | 105270.1754 | 1 |
| 316   | 937.6 | 107901.7544 | 1 |

|       |       |             |   |
|-------|-------|-------------|---|
| 316.1 | 937.5 | 107115.7895 | 1 |
| 316.2 | 937.4 | 108203.5088 | 1 |
| 316.3 | 937.3 | 108764.9123 | 1 |
| 316.4 | 937.2 | 110056.1404 | 1 |
| 316.5 | 937.1 | 107522.807  | 1 |
| 316.6 | 937   | 108792.9825 | 1 |
| 316.7 | 936.9 | 108336.8421 | 1 |
| 316.8 | 936.8 | 107459.6491 | 1 |
| 316.9 | 936.7 | 107073.6842 | 1 |
| 317   | 936.6 | 109052.6316 | 1 |
| 317.1 | 936.5 | 106821.0526 | 1 |
| 317.2 | 936.4 | 108098.2456 | 1 |
| 317.3 | 936.3 | 107087.7193 | 1 |
| 317.4 | 936.2 | 108554.386  | 1 |
| 317.5 | 936.1 | 106947.3684 | 1 |
| 317.6 | 936   | 105824.5614 | 1 |
| 317.7 | 935.9 | 105726.3158 | 1 |
| 317.8 | 935.8 | 104098.2456 | 1 |
| 317.9 | 935.7 | 103564.9123 | 1 |
| 318   | 935.6 | 100940.3509 | 1 |
| 318.1 | 935.5 | 100308.7719 | 1 |
| 318.2 | 935.4 | 100610.5263 | 1 |
| 318.3 | 935.3 | 97621.05263 | 1 |
| 318.4 | 935.2 | 97873.68421 | 1 |
| 318.5 | 935.1 | 96463.1579  | 1 |
| 318.6 | 935   | 96400       | 1 |
| 318.7 | 934.9 | 94898.24561 | 1 |
| 318.8 | 934.8 | 94596.49123 | 1 |
| 318.9 | 934.7 | 93515.78947 | 1 |
| 319   | 934.6 | 93901.75439 | 1 |
| 319.1 | 934.5 | 90652.63158 | 1 |
| 319.2 | 934.4 | 90035.08772 | 1 |
| 319.3 | 934.3 | 89698.24561 | 1 |
| 319.4 | 934.2 | 89761.40351 | 1 |
| 319.5 | 934.1 | 90610.52632 | 1 |
| 319.6 | 934   | 91150.87719 | 1 |
| 319.7 | 933.9 | 90210.52632 | 1 |
| 319.8 | 933.8 | 88582.45614 | 1 |
| 319.9 | 933.7 | 89431.57895 | 1 |
| 320   | 933.6 | 88364.91228 | 1 |
| 320.1 | 933.5 | 87459.64912 | 1 |
| 320.2 | 933.4 | 88659.64912 | 1 |
| 320.3 | 933.3 | 86435.08772 | 1 |
| 320.4 | 933.2 | 86091.22807 | 1 |
| 320.5 | 933.1 | 86350.87719 | 1 |
| 320.6 | 933   | 85024.5614  | 1 |
| 320.7 | 932.9 | 86729.82456 | 1 |



|       |       |             |   |
|-------|-------|-------------|---|
| 320.8 | 932.8 | 86414.03509 | 1 |
| 320.9 | 932.7 | 85417.54386 | 1 |
| 321   | 932.6 | 85571.92983 | 1 |
| 321.1 | 932.5 | 85501.75439 | 1 |
| 321.2 | 932.4 | 85705.26316 | 1 |
| 321.3 | 932.3 | 85438.59649 | 1 |
| 321.4 | 932.2 | 85052.63158 | 1 |
| 321.5 | 932.1 | 86007.01754 | 1 |
| 321.6 | 932   | 86364.91228 | 1 |
| 321.7 | 931.9 | 85164.91228 | 1 |
| 321.8 | 931.8 | 84891.22807 | 1 |
| 321.9 | 931.7 | 85480.70175 | 1 |
| 322   | 931.6 | 85522.80702 | 1 |
| 322.1 | 931.5 | 86168.42105 | 1 |
| 322.2 | 931.4 | 85494.73684 | 1 |
| 322.3 | 931.3 | 87164.91228 | 1 |
| 322.4 | 931.2 | 86624.5614  | 1 |
| 322.5 | 931.1 | 86343.85965 | 1 |
| 322.6 | 931   | 86842.10526 | 1 |
| 322.7 | 930.9 | 87052.63158 | 1 |
| 322.8 | 930.8 | 85824.5614  | 1 |
| 322.9 | 930.7 | 86245.61404 | 1 |
| 323   | 930.6 | 85635.08772 | 1 |
| 323.1 | 930.5 | 86329.82456 | 1 |
| 323.2 | 930.4 | 86077.19298 | 1 |
| 323.3 | 930.3 | 84701.75439 | 1 |
| 323.4 | 930.2 | 85978.94737 | 1 |
| 323.5 | 930.1 | 85178.94737 | 1 |
| 323.6 | 930   | 85656.14035 | 1 |
| 323.7 | 929.9 | 85515.78947 | 1 |
| 323.8 | 929.8 | 86287.7193  | 1 |
| 323.9 | 929.7 | 86750.87719 | 1 |
| 324   | 929.6 | 87221.05263 | 1 |
| 324.1 | 929.5 | 85684.21053 | 1 |
| 324.2 | 929.4 | 86849.12281 | 1 |
| 324.3 | 929.3 | 85943.85965 | 1 |
| 324.4 | 929.2 | 85726.31579 | 1 |
| 324.5 | 929.1 | 86470.17544 | 1 |
| 324.6 | 929   | 86266.66667 | 1 |
| 324.7 | 928.9 | 85824.5614  | 1 |
| 324.8 | 928.8 | 85971.92983 | 1 |
| 324.9 | 928.7 | 87459.64912 | 1 |
| 325   | 928.6 | 86575.4386  | 1 |
| 325.1 | 928.5 | 86519.29825 | 1 |
| 325.2 | 928.4 | 86638.59649 | 1 |
| 325.3 | 928.3 | 88315.78947 | 1 |
| 325.4 | 928.2 | 86392.98246 | 1 |

|       |       |             |   |
|-------|-------|-------------|---|
| 325.5 | 928.1 | 88287.7193  | 1 |
| 325.6 | 928   | 86729.82456 | 1 |
| 325.7 | 927.9 | 85291.22807 | 1 |

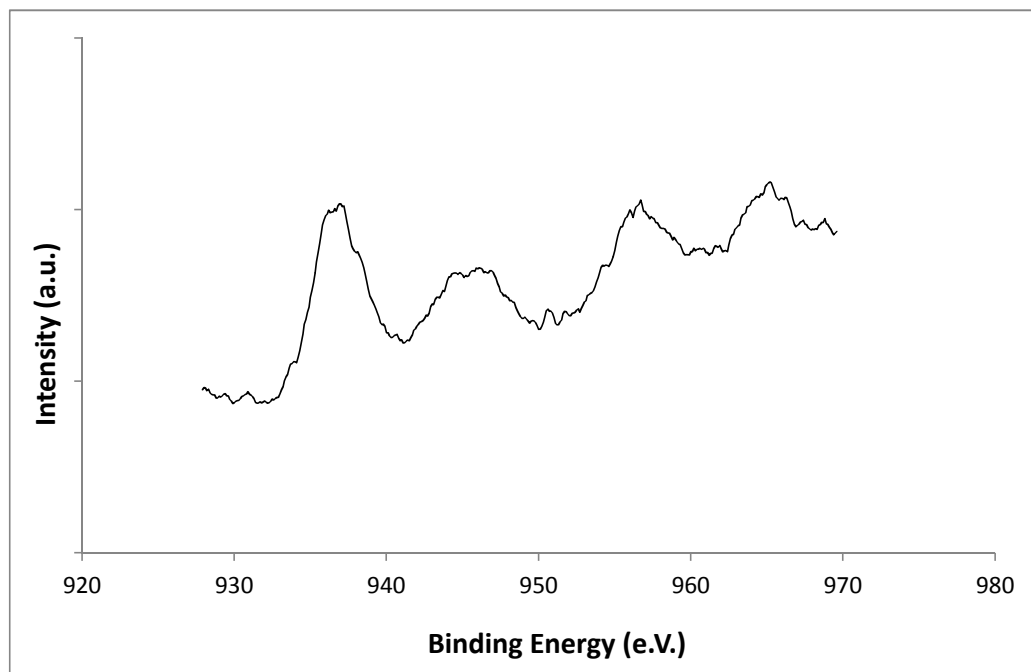

Supplement: c3cy00626c_8.pdf [file c3cy00626c_8.pdf]
